# Supplementary material
Source: PubMed Central journal article supplement (PMC2683703)
Supplement: emboj200954s3.pdf [file emboj200954s3.pdf]

| Suppl. Table-I<br>Gene ID | Gene list of total light responsive genes<br>Annotation                                    |
|---------------------------|--------------------------------------------------------------------------------------------|
| 18a7_160                  | MIPS:conserved hypothetical protein BROAD:NULL                                             |
| 4nc630_150                | MIPS:putative protein BROAD:NULL                                                           |
| 4nc710_010                | MIPS:related to glia maturation factor beta BROAD:NULL                                     |
| NCU00111.2                | MIPS:putative protein BROAD:predicted protein                                              |
| NCU00132.2                | MIPS:hypothetical protein BROAD:predicted protein                                          |
| NCU00203.2                | MIPS:related to sirtuin type 4 BROAD:hypothetical protein                                  |
| NCU00236.2                | MIPS:conserved hypothetical protein BROAD:hypothetical protein                             |
| NCU00244.2                | MIPS:related to galactinol synthase BROAD:hypothetical protein                             |
| NCU00263.2                | MIPS:probable subtilisin-like serine protease BROAD:hypothetical protein                   |
| NCU00276.2                | MIPS:DNA polymerase gamma BROAD:DNA POLYMERASE GAMMA (MITOCHONDRIAL DNA POLYMER            |
| NCU00281.2                | MIPS:probable sterol glucosyltransferase BROAD:hypothetical protein                        |
| NCU00299.2                | MIPS:related to delta3-cis-delta2-trans-enoyl-CoA isomerase BROAD:hypothetical             |
| NCU00309.2                | MIPS:conserved hypothetical protein BROAD:hypothetical protein                             |
| NCU00322.2                | MIPS:putative protein BROAD:predicted protein                                              |
| NCU00326.2                | MIPS:related to senescence marker protein 30 BROAD:hypothetical protein                    |
| NCU00360.2                | MIPS:conserved hypothetical protein BROAD:hypothetical protein                             |
| NCU00401.2                | MIPS:conserved hypothetical protein BROAD:predicted protein                                |
| NCU00430.2                | MIPS:related to Na <sup>+</sup> /H <sup>+</sup> antiporter CNH1 BROAD:hypothetical protein |
| NCU00513.2                | MIPS:conserved hypothetical protein BROAD:hypothetical protein                             |
| NCU00549.2                | MIPS:related to glutathione transferase omega 1 BROAD:hypothetical protein                 |
| NCU00552.2                | MIPS:phytoene dehydrogenase AL-1 (carotenoid biosynthesis protein al-1) BROAD:P            |
| NCU00553.2                | MIPS:related to GTPase-activating protein beta-chimerin BROAD:hypothetical prot            |
| NCU00575.2                | MIPS:probable glucokinase BROAD:hypothetical protein                                       |
| NCU00582.2                | MIPS:related to deoxyribodipyrimidine photo-lyase BROAD:hypothetical protein               |
| NCU00584.2                | MIPS:conserved hypothetical protein BROAD:predicted protein                                |
| NCU00585.2                | MIPS:geranylgeranyl-diphosphate geranylgeranyltransferase (AL-2) BROAD:PHYTOENE            |
| NCU00586.2                | MIPS:conserved hypothetical protein BROAD:predicted protein                                |
| NCU00720.2                | MIPS:probable L-lactate dehydrogenase BROAD:hypothetical protein                           |
| NCU00766.2                | MIPS:conserved hypothetical protein BROAD:predicted protein                                |
| NCU00790.2                | MIPS:potassium transporter hak-1 BROAD:hypothetical protein ( (AJ009759) potass            |
| NCU00793.2                | MIPS:related to alpha,alpha-trehalose-phosphate synthase (UDP-forming) BROAD:hy            |
| NCU00838.2                | MIPS:related to dehydroshikimate dehydratase BROAD:hypothetical protein                    |

NCU00859.2 MIPS:putative protein BROAD:hypothetical protein  
NCU00884.2 MIPS:related to wound-inducible protein AWI 31 BROAD:hypothetical protein  
NCU00911.2 MIPS:putative protein BROAD:predicted protein  
NCU00939.2 MIPS:conserved hypothetical protein BROAD:hypothetical protein  
NCU00999.1 MIPS:NULL BROAD:predicted protein  
NCU01089.2 MIPS:hypothetical protein BROAD:predicted protein  
NCU01107.2 MIPS:related to light induced alcohol dehydrogenase Bli-4 BROAD:hypothetical pr  
NCU01117.2 MIPS:NULL BROAD:hypothetical protein ( hypothetical protein 13E11.320 [imported  
NCU01154.2 MIPS:related to NsdD protein BROAD:hypothetical protein  
NCU01193.2 MIPS:related to cholesterol oxidase precursor BROAD:predicted protein  
NCU01243.2 MIPS:conserved hypothetical protein BROAD:hypothetical protein  
NCU01258.2 MIPS:probable cyanate lyase BROAD:hypothetical protein  
NCU01345.2 MIPS:related to transcription factor atf1+ BROAD:hypothetical protein ( (AL4510  
NCU01419.2 MIPS:probable NADPH quinone oxidoreductase homolog PIG3 BROAD:hypothetical prot  
NCU01422.2 MIPS:probable multiprotein bridging factor MBF1 BROAD:hypothetical protein  
NCU01427.2 MIPS:farnesyltranstransferase (al-3) BROAD:GERANYLGERANYL PYROPHOSPHATE SYNTHET  
NCU01510.2 MIPS:conserved hypothetical protein BROAD:hypothetical protein ( (AL355932) con  
NCU01539.2 MIPS:conserved hypothetical protein BROAD:hypothetical protein  
NCU01555.2 MIPS:putative protein BROAD:hypothetical protein ( (AL451012) putative protein  
NCU01636.2 MIPS:related to glutathione s-transferase subunit 13 BROAD:hypothetical protein  
NCU01763.2 MIPS:related to endozepine BROAD:hypothetical protein ( endozepine related prot  
NCU01767.2 MIPS:related to Type 2C Protein Phosphatase BROAD:Type 2C Protein Phosphatase r  
NCU01768.2 MIPS:conserved hypothetical protein BROAD:hypothetical protein ( hypothetical p  
NCU01797.2 MIPS:serine/threonine protein kinase NRC-2 BROAD:hypothetical protein  
NCU01815.2 MIPS:related to CYTOCHROME B561 BROAD:predicted protein  
NCU01844.2 MIPS:conserved hypothetical protein BROAD:predicted protein  
NCU01847.1 MIPS:Nuc-2 protein BROAD:hypothetical protein  
NCU01861.2 MIPS:related to NAD(P)H-dependent oxidoreductase BROAD:hypothetical protein  
NCU01881.2 MIPS:hypothetical protein BROAD:predicted protein  
NCU01895.2 MIPS:related to response regulator Mcs4 BROAD:hypothetical protein  
NCU01904.2 MIPS:related to 2-deoxy-D-gluconate 3-dehydrogenase BROAD:hypothetical protein  
NCU01905.2 MIPS:related to NAD-dependent sorbitol dehydrogenase BROAD:hypothetical protein  
NCU01906.2 MIPS:probable aldehyde reductase BROAD:hypothetical protein  
NCU01997.2 MIPS:conserved hypothetical protein BROAD:hypothetical protein

NCU02124.2 MIPS:conserved hypothetical protein BROAD:hypothetical protein  
NCU02190.2 MIPS:related to KES1 protein BROAD:hypothetical protein  
NCU02191.2 MIPS:conserved hypothetical protein BROAD:hypothetical protein  
NCU02203.2 MIPS:conserved hypothetical protein BROAD:hypothetical protein  
NCU02255.2 MIPS:conserved hypothetical protein BROAD:hypothetical protein  
NCU02264.2 MIPS:related to prefoldin subunit 3 BROAD:hypothetical protein  
NCU02265.2 MIPS:period clock protein FRQ BROAD:FREQUENCY CLOCK PROTEIN  
NCU02287.2 MIPS:probable acyl-CoA dehydrogenase BROAD:hypothetical protein  
NCU02322.2 MIPS:related to mannose-6-phosphate isomerase BROAD:hypothetical protein  
NCU02356.2 MIPS:white collar 1 protein BROAD:WHITE COLLAR 1 PROTEIN (WC1)  
NCU02375.2 MIPS:related to ubiquitin-specific protease 22 BROAD:hypothetical protein  
NCU02397.2 MIPS:probable pyruvate decarboxylase BROAD:hypothetical protein  
NCU02512.2 MIPS:hypothetical protein BROAD:predicted protein  
NCU02513.2 MIPS:conserved hypothetical protein BROAD:hypothetical protein  
NCU02540.2 MIPS:conserved hypothetical protein BROAD:hypothetical protein  
NCU02579.2 MIPS:conserved hypothetical protein BROAD:predicted protein  
NCU02596.2 MIPS:putative protein BROAD:predicted protein  
NCU02599.2 MIPS:related to yeast endoplasmic reticulum 25 kDa transmembrane protein BROAD:  
NCU02691.2 MIPS:hypothetical protein BROAD:predicted protein  
NCU02712.2 MIPS:related to acetate kinase BROAD:hypothetical protein  
NCU02713.2 MIPS:related to transcriptional repressor BROAD:hypothetical protein  
NCU02765.2 MIPS:conserved hypothetical protein BROAD:predicted protein  
NCU02771.2 MIPS:probable uroporphyrinogen decarboxylase BROAD:hypothetical protein  
NCU02801.2 MIPS:related to benzodiazepine receptor, peripheral-type BROAD:hypothetical pro  
NCU02819.2 MIPS:related to nonhistone chromosomal protein BROAD:hypothetical protein  
NCU02887.2 MIPS:probable potassium channel beta subunit protein BROAD:hypothetical protein  
NCU02888.2 MIPS:conserved hypothetical protein BROAD:hypothetical protein  
NCU02906.2 MIPS:probable malate dehydrogenase (oxaloacetate decarboxylating) (NADP+) BROAD  
NCU02945.2 MIPS:hypothetical protein BROAD:predicted protein  
NCU02948.2 MIPS:probable 1,4-Benzoquinone reductase BROAD:hypothetical protein  
NCU03071.2 MIPS:related to MAP kinase kinase kinase Wis4 BROAD:hypothetical protein  
NCU03072.2 MIPS:hypothetical protein BROAD:predicted protein  
NCU03151.2 MIPS:probable peroxisomal membrane protein BROAD:hypothetical protein  
NCU03188.2 MIPS:related to D-arabinono-1,4-lactone oxidase BROAD:hypothetical protein

NCU03214.2 MIPS:related to endoplasmic reticulum retention receptor BROAD:hypothetical pro  
NCU03263.2 MIPS:probable putative transmembrane protein BROAD:hypothetical protein  
NCU03290.2 MIPS:related to secreted dipeptidyl-peptidase V precursor BROAD:hypothetical pr  
NCU03312.2 MIPS:conserved hypothetical protein BROAD:hypothetical protein  
NCU03341.2 MIPS:related to protein transport protein SEC6 BROAD:hypothetical protein  
NCU03357.2 MIPS:related to ubiquitin fusion degradation protein 2 BROAD:hypothetical prote  
NCU03358.2 MIPS:conserved hypothetical protein BROAD:hypothetical protein  
NCU03378.2 MIPS:related to tol protein BROAD:hypothetical protein  
NCU03415.2 MIPS:probable aldehyde dehydrogenase BROAD:hypothetical protein  
NCU03460.2 MIPS:probable cis-prenyltransferase BROAD:hypothetical protein  
NCU03530.2 MIPS:related to chitinase 3 precursor protein BROAD:hypothetical protein  
NCU03602.2 MIPS:conserved hypothetical protein BROAD:hypothetical protein  
NCU03617.2 MIPS:conserved hypothetical protein BROAD:hypothetical protein ( (AL513444) con  
NCU03643.2 MIPS:probable CUTINASE TRANSCRIPTION FACTOR 1 BETA BROAD:hypothetical protein (  
NCU03685.2 MIPS:related to glucan 1,4-alpha-glucosidase BROAD:hypothetical protein ( (AL35  
NCU03699.2 MIPS:conserved hypothetical protein BROAD:hypothetical protein  
NCU03731.2 MIPS:conserved hypothetical protein BROAD:hypothetical protein ( (AL513467) con  
NCU03779.2 MIPS:probable glycerone kinase isoform BROAD:hypothetical protein ( (AL513466)  
NCU03780.2 MIPS:hypothetical protein BROAD:hypothetical protein  
NCU03803.2 MIPS:related to SORBITOL UTILIZATION PROTEIN SOU1 BROAD:hypothetical protein (  
NCU03967.2 MIPS:vivid PAS protein VVD BROAD:hypothetical protein ( (AF338412) vivid PAS pr  
NCU03968.2 MIPS:related to DNA repair protein MMS21 BROAD:predicted protein  
NCU04071.2 MIPS:carboxy-cis,cis-muconate cyclase BROAD:CARBOXY-CIS,CIS-MUCONATE CYCLASE (3  
NCU04091.2 MIPS:hypothetical protein BROAD:predicted protein  
NCU04174.2 MIPS:conserved hypothetical protein BROAD:hypothetical protein  
NCU04179.2 MIPS:related to finger protein AZF1 BROAD:hypothetical protein ( (AL451015) rel  
NCU04265.2 MIPS:related to beta-fructofuranosidase BROAD:related to beta-fructofuranosidas  
NCU04266.2 MIPS:putative protein BROAD:hypothetical protein ( (AL513462) putative protein  
NCU04274.2 MIPS:related to Sts1 protein BROAD:hypothetical protein ( (AL513462) related to  
NCU04295.2 MIPS:conserved hypothetical protein BROAD:hypothetical protein ( (AL451109) con  
NCU04342.2 MIPS:conserved hypothetical protein BROAD:hypothetical protein  
NCU04343.2 MIPS:conserved hypothetical protein BROAD:hypothetical protein  
NCU04371.2 MIPS:probable peptidylprolyl isomerase (FK506-binding protein homolog) BROAD:pr  
NCU04387.2 MIPS:vacuolar ATP synthase subunit F BROAD:VACUOLAR ATP SYNTHASE SUBUNIT F (V-A

NCU04415.2 MIPS:related to brefeldin A resistance protein BROAD:hypothetical protein  
NCU04417.2 MIPS:conserved hypothetical protein BROAD:predicted protein  
NCU04452.2 MIPS:probable NADPH2 dehydrogenase chain OYE2 BROAD:hypothetical protein  
NCU04460.2 MIPS:probable galactose-1-phosphate uridylyltransferase BROAD:hypothetical prot  
NCU04474.2 MIPS:hypothetical protein BROAD:hypothetical protein  
NCU04510.2 MIPS:related to glycerol dehydrogenase BROAD:hypothetical protein  
NCU04533.2 MIPS:related to calcium-dependent cell adhesion molecule-1 BROAD:hypothetical p  
NCU04605.2 MIPS:hypothetical protein BROAD:predicted protein  
NCU04635.2 MIPS:related to mismatched base pair and cruciform dna recognition protein BROA  
NCU04637.2 MIPS:probable RVS167 protein BROAD:hypothetical protein  
NCU04667.2 MIPS:putative protein BROAD:predicted protein  
NCU04674.2 MIPS:related to alpha-glucosidase b BROAD:hypothetical protein  
NCU04675.2 MIPS:putative protein BROAD:predicted protein  
NCU04676.2 MIPS:conserved hypothetical protein BROAD:hypothetical protein  
NCU04757.2 MIPS:hypothetical protein BROAD:predicted protein  
NCU04796.2 MIPS:probable Acetyl-CoA acyltransferase BROAD:hypothetical protein  
NCU04797.2 MIPS:probable Fructose-1,6-bisphosphatase BROAD:hypothetical protein  
NCU04801.2 MIPS:hypothetical protein BROAD:hypothetical protein  
NCU04814.2 MIPS:hypothetical protein BROAD:hypothetical protein  
NCU04823.2 MIPS:probable alcohol dehydrogenase (NADP+) BROAD:hypothetical protein  
NCU04908.2 MIPS:putative protein BROAD:hypothetical protein  
NCU04921.2 MIPS:conserved hypothetical protein BROAD:predicted protein  
NCU04946.2 MIPS:putative protein BROAD:predicted protein  
NCU04963.2 MIPS:probable monosaccharide transporter BROAD:hypothetical protein  
NCU05007.2 MIPS:conserved hypothetical protein BROAD:hypothetical protein  
NCU05061.2 MIPS:hypothetical protein BROAD:predicted protein  
NCU05133.2 MIPS:related to UDP-glucose 4-epimerase BROAD:hypothetical protein  
NCU05148.2 MIPS:hypothetical protein BROAD:predicted protein  
NCU05169.2 MIPS:probable catalase isozyme P BROAD:hypothetical protein  
NCU05291.2 MIPS:related to acetyltransferase BROAD:predicted protein  
NCU05429.2 MIPS:probable branching enzyme (be1) BROAD:probable branching enzyme [MIPS]  
NCU05490.2 MIPS:hypothetical protein BROAD:predicted protein  
NCU05594.2 MIPS:conserved hypothetical protein BROAD:hypothetical protein  
NCU05627.2 MIPS:related to sugar transporter BROAD:hypothetical protein

NCU05639.2 MIPS:hypothetical protein BROAD:predicted protein  
NCU05652.2 MIPS:NULL BROAD:predicted protein  
NCU05683.2 MIPS:probable dihydroxy-acid dehydratase BROAD:hypothetical protein  
NCU05721.2 MIPS:conserved hypothetical protein BROAD:hypothetical protein  
NCU05770.2 MIPS:catalase 2 BROAD:hypothetical protein  
NCU05785.2 MIPS:probable calcium-related spray protein BROAD:hypothetical protein  
NCU05786.2 MIPS:NULL BROAD:predicted protein  
NCU05844.2 MIPS:hypothetical protein BROAD:predicted protein  
NCU05850.2 MIPS:conserved hypothetical protein BROAD:hypothetical protein  
NCU05858.2 MIPS:related to linoleate diol synthase BROAD:hypothetical protein  
NCU05882.2 MIPS:conserved hypothetical protein BROAD:hypothetical protein  
NCU05897.2 MIPS:related to glucose/galactose transporter BROAD:hypothetical protein  
NCU06005.2 MIPS:probable glycerol kinase (ATP:glycerol 3-phosphotransferase) BROAD:hypothetical protein  
NCU06009.2 MIPS:conserved hypothetical protein BROAD:hypothetical protein  
NCU06020.2 MIPS:related to extracellular chitinase BROAD:hypothetical protein  
NCU06095.2 MIPS:related to transcription factor BOM BROAD:hypothetical protein  
NCU06131.2 MIPS:conserved hypothetical protein BROAD:predicted protein  
NCU06203.2 MIPS:putative protein BROAD:predicted protein  
NCU06218.2 MIPS:conserved hypothetical protein BROAD:hypothetical protein  
NCU06265.2 MIPS:conserved hypothetical protein BROAD:hypothetical protein  
NCU06306.2 MIPS:related to proliferation associated SNF2-like protein BROAD:hypothetical p  
NCU06407.2 MIPS:hypothetical protein BROAD:hypothetical protein  
NCU06416.2 MIPS:related to gibberellin 20-oxidase BROAD:hypothetical protein  
NCU06420.2 MIPS:putative protein BROAD:predicted protein  
NCU06506.2 MIPS:hypothetical protein BROAD:predicted protein  
NCU06549.2 MIPS:Sno-type pyridoxine vitamin B6 biosynthetic protein SNO1 BROAD:hypothetical  
NCU06554.2 MIPS:conserved hypothetical protein BROAD:hypothetical protein ( (AF309689) put  
NCU06597.2 MIPS:hypothetical protein BROAD:predicted protein  
NCU06603.2 MIPS:related to NonF protein, involved in nonactin biosynthesis BROAD:hypothetical  
NCU06662.2 MIPS:conserved hypothetical protein BROAD:hypothetical protein  
NCU06682.2 MIPS:conserved hypothetical protein BROAD:predicted protein  
NCU06751.2 MIPS:conserved hypothetical protein BROAD:hypothetical protein  
NCU06915.2 MIPS:hypothetical protein BROAD:predicted protein  
NCU06977.2 MIPS:putative protein BROAD:predicted protein

NCU06986.2 MIPS:conserved hypothetical protein BROAD:hypothetical protein  
NCU07024.2 MIPS:osmotic sensitive-2 protein (putative mitogen-activated protein (MAP) kinas  
NCU07061.2 MIPS:putative protein BROAD:predicted protein  
NCU07064.2 MIPS:conserved hypothetical protein BROAD:hypothetical protein  
NCU07075.2 MIPS:calcium/proton exchanger BROAD:hypothetical protein ( (AF053229) calcium/p  
NCU07082.2 MIPS:related to aspartate-tRNA ligase, cytosolic BROAD:hypothetical protein  
NCU07119.2 MIPS:related to non-ribosomal peptide synthetase BROAD:hypothetical protein  
NCU07120.2 MIPS:conserved hypothetical protein BROAD:hypothetical protein  
NCU07142.2 MIPS:putative protein BROAD:predicted protein  
NCU07159.2 MIPS:probable endopeptidase K BROAD:hypothetical protein  
NCU07221.2 MIPS:related to histidine kinase tcsA protein BROAD:hypothetical protein  
NCU07232.2 MIPS:related to heat shock protein 30 BROAD:hypothetical protein  
NCU07264.2 MIPS:probable ubiquitin-conjugating enzyme E2 BROAD:hypothetical protein  
NCU07267.2 MIPS:blue-light-inducible Bli-3 protein BROAD:BLI-3 PROTEIN  
NCU07273.2 MIPS:putative protein BROAD:predicted protein  
NCU07287.2 MIPS:related to DNA damage-responsive protein 48 BROAD:predicted protein  
NCU07296.2 MIPS:serine/threonine protein kinase COT-1 BROAD:hypothetical protein  
NCU07325.2 MIPS:conidation-specific protein CON-10 BROAD:hypothetical protein  
NCU07332.2 MIPS:related to ACB 4-hydroxyacetophenone monooxygenase BROAD:hypothetical prot  
NCU07338.2 MIPS:related to alpha-1,6-mannosyltransferase HOC1 BROAD:hypothetical protein  
NCU07363.2 MIPS:putative protein BROAD:predicted protein  
NCU07400.2 MIPS:hypothetical protein BROAD:hypothetical protein  
NCU07401.1 MIPS:conserved hypothetical protein BROAD:predicted protein  
NCU07424.2 MIPS:hypothetical protein BROAD:predicted protein  
NCU07434.2 MIPS:related to short chain dehydrogenase BROAD:hypothetical protein  
NCU07441.2 MIPS:hypothetical protein BROAD:predicted protein  
NCU07453.2 MIPS:hypothetical protein BROAD:predicted protein  
NCU07541.2 MIPS:hypothetical protein BROAD:predicted protein  
NCU07584.2 MIPS:related to vacuolar segregation protein PEP7 BROAD:hypothetical protein  
NCU07585.2 MIPS:related to siroheme synthase BROAD:hypothetical protein  
NCU07649.2 MIPS:NULL BROAD:hypothetical protein  
NCU07661.2 MIPS:hypothetical protein BROAD:predicted protein  
NCU07675.2 MIPS:putative protein BROAD:predicted protein  
NCU07723.2 MIPS:probable norsolorinic acid reductase BROAD:hypothetical protein

NCU07745.2 MIPS:putative protein BROAD:predicted protein  
NCU07921.2 MIPS:hypothetical protein BROAD:predicted protein  
NCU07962.2 MIPS:putative protein BROAD:predicted protein  
NCU07971.2 MIPS:conserved hypothetical protein BROAD:hypothetical protein  
NCU08057.2 MIPS:related to tropinone reductase BROAD:hypothetical protein  
NCU08064.2 MIPS:conserved hypothetical protein BROAD:hypothetical protein  
NCU08070.2 MIPS:conserved hypothetical protein BROAD:hypothetical protein  
NCU08095.2 MIPS:hypothetical protein BROAD:predicted protein  
NCU08127.2 MIPS:related to DFG5 protein BROAD:hypothetical protein  
NCU08133.2 MIPS:related to carbonate dehydratase BROAD:hypothetical protein  
NCU08190.2 MIPS:conserved hypothetical protein BROAD:hypothetical protein  
NCU08224.2 MIPS:hypothetical protein BROAD:predicted protein  
NCU08280.2 MIPS:related to squalene monooxygenase BROAD:hypothetical protein  
NCU08290.2 MIPS:related to ATP-dependent DNA helicase II, 70 kDa subunit BROAD:hypothetica  
NCU08291.2 MIPS:probable ferrochelatase BROAD:hypothetical protein  
NCU08418.2 MIPS:related to tripeptidyl-peptidase I BROAD:hypothetical protein  
NCU08440.2 MIPS:conserved hypothetical protein BROAD:predicted protein  
NCU08455.2 MIPS:hypothetical protein BROAD:predicted protein  
NCU08457.2 MIPS:hydrophobin Ccg-2 BROAD:hypothetical protein  
NCU08501.2 MIPS:related to TOM1 protein BROAD:related to TOM1 protein [MIPS]  
NCU08549.2 MIPS:related to UDP-glucose 4-epimerase BROAD:hypothetical protein  
NCU08626.2 MIPS:deoxyribodipyrimidine photo-lyase PHR BROAD:DEOXYRIBODIPYRIMIDINE PHOTOLYA  
NCU08674.2 MIPS:conserved hypothetical protein BROAD:hypothetical protein  
NCU08677.2 MIPS:hypothetical protein BROAD:predicted protein  
NCU08699.2 MIPS:alcohol dehydrogenase homolog Bli-4 BROAD:PUTATIVE OXIDOREDUCTASE BLI-4 PR  
NCU08769.2 MIPS:conidiation protein 6 (con-6) BROAD:CONIDIATION-SPECIFIC PROTEIN 6  
NCU08791.2 MIPS:catalase-1 BROAD:hypothetical protein ( AY027545) Catalase-1 [Neurospora  
NCU08824.2 MIPS:NULL BROAD:hypothetical protein  
NCU08850.2 MIPS:UV-endonuclease UVE-1 BROAD:hypothetical protein ( D11392) UV-endonucleas  
NCU08922.2 MIPS:hypothetical protein BROAD:predicted protein  
NCU08949.2 MIPS:conserved hypothetical protein BROAD:hypothetical protein  
NCU09041.2 MIPS:probable L-xylulose reductase BROAD:hypothetical protein  
NCU09043.2 MIPS:related to calcium-binding protein caleosin BROAD:hypothetical protein  
NCU09051.2 MIPS:related to formaldehyde dehydrogenase BROAD:hypothetical protein



NCU09057.2 MIPS:putative protein BROAD:hypothetical protein  
NCU09079.2 MIPS:conserved hypothetical protein BROAD:hypothetical protein  
NCU09115.2 MIPS:related to cytochrome P450 52A12; alkane hydroxylase 1 BROAD:hypothetical  
NCU09141.2 MIPS:probable pyridoxine 4-dehydrogenase BROAD:hypothetical protein  
NCU09201.2 MIPS:hypothetical protein BROAD:predicted protein  
NCU09209.2 MIPS:probable galactose oxidase precursor BROAD:hypothetical protein  
NCU09210.2 MIPS:related to peroxidase DyP BROAD:hypothetical protein  
NCU09266.2 MIPS:probable methylmalonate-semialdehyde dehydrogenase (acylating) BROAD:hypot  
NCU09290.2 MIPS:probable proteasome endopeptidase complex chain PRE3; 20S proteasome subuni  
NCU09306.2 MIPS:related to beta-carotene 15,15'-dioxygenase BROAD:hypothetical protein  
NCU09403.2 MIPS:hypothetical protein BROAD:hypothetical protein  
NCU09502.2 MIPS:hypothetical protein BROAD:predicted protein  
NCU09526.2 MIPS:putative protein BROAD:predicted protein  
NCU09532.2 MIPS:related to dihydrodipicolinate synthase BROAD:hypothetical protein  
NCU09533.2 MIPS:conserved hypothetical protein BROAD:predicted protein  
NCU09534.2 MIPS:probable glutathione peroxidase BROAD:hypothetical protein  
NCU09535.2 MIPS:conserved hypothetical protein BROAD:hypothetical protein  
NCU09553.2 MIPS:probable 3-hydroxybutyryl-CoA dehydrogenase BROAD:hypothetical protein  
NCU09560.2 MIPS:probable superoxide dismutase (Mn) precursor BROAD:hypothetical protein  
NCU09579.2 MIPS:conserved hypothetical protein BROAD:hypothetical protein  
NCU09646.2 MIPS:strong similarity to acetyl-CoA C-acyltransferase, peroxisomal BROAD:hypot  
NCU09692.2 MIPS:related to diacylglycerol pyrophosphate phosphatase DPP1 BROAD:hypothetica  
NCU09714.2 MIPS:hypothetical protein BROAD:predicted protein  
NCU09715.2 MIPS:probable trehalose-6-phosphate synthase subunit 1 BROAD:hypothetical prote  
NCU09716.2 MIPS:hypothetical protein BROAD:predicted protein  
NCU09723.2 MIPS:hypothetical protein BROAD:predicted protein  
NCU09783.2 MIPS:NULL BROAD:hypothetical protein  
NCU09820.2 MIPS:related to protein YBT1 (bile acid transporter) BROAD:hypothetical protein  
NCU09821.2 MIPS:conserved hypothetical protein BROAD:hypothetical protein  
NCU09830.2 MIPS:probable ATP-binding cassette multidrug transport protein; ABC transporter  
NCU09841.2 MIPS:related to low molecular weight phosphotyrosine protein phosphatase BROAD:  
NCU09883.2 MIPS:hypothetical protein BROAD:predicted protein  
NCU09931.2 MIPS:conserved hypothetical protein BROAD:hypothetical protein ( hypothetical p  
NCU09937.2 MIPS:conserved hypothetical protein BROAD:hypothetical protein ( hypothetical p

NCU09992.2 MIPS:conserved hypothetical protein BROAD:hypothetical protein  
NCU10011.2 MIPS:related to cytochrome P450 (CYP94A1) BROAD:hypothetical protein  
NCU10021.2 MIPS:related to monosaccharide H<sup>+</sup> symporter (fragment) BROAD:hypothetical prote  
NCU10063.2 MIPS:NULL BROAD:hypothetical protein  
NCU10360.2 MIPS:conserved hypothetical protein BROAD:hypothetical protein  
NCU10656.2 MIPS:related to alcohol dehydrogenase BROAD:hypothetical protein  
NCU10880.2 MIPS:related to phosphoserine phosphatase fcp1 BROAD:hypothetical protein  
NCU10997.2 MIPS:con-8 protein BROAD:hypothetical protein  
NCU11090.2 MIPS:related to salicylate 1-monooxygenase (flavoprotein monooxygenase) BROAD:p  
xnc105\_090 MIPS:probable exochitinase BROAD:NULL

| Suppl. Table-II | Gene list of early light responsive genes                                                  |
|-----------------|--------------------------------------------------------------------------------------------|
| Gene ID         | Annotation                                                                                 |
| 18a7_160        | MIPS:conserved hypothetical protein BROAD:NULL                                             |
| 4nc710_010      | MIPS:related to glia maturation factor beta BROAD:NULL                                     |
| NCU00203.2      | MIPS:related to sirtuin type 4 BROAD:hypothetical protein                                  |
| NCU00236.2      | MIPS:conserved hypothetical protein BROAD:hypothetical protein                             |
| NCU00244.2      | MIPS:related to galactinol synthase BROAD:hypothetical protein                             |
| NCU00276.2      | MIPS:DNA polymerase gamma BROAD:DNA POLYMERASE GAMMA (MITOCHONDRIAL DNA POLYMER            |
| NCU00309.2      | MIPS:conserved hypothetical protein BROAD:hypothetical protein                             |
| NCU00326.2      | MIPS:related to senescence marker protein 30 BROAD:hypothetical protein                    |
| NCU00360.2      | MIPS:conserved hypothetical protein BROAD:hypothetical protein                             |
| NCU00430.2      | MIPS:related to Na <sup>+</sup> /H <sup>+</sup> antiporter CNH1 BROAD:hypothetical protein |
| NCU00549.2      | MIPS:related to glutathione transferase omega 1 BROAD:hypothetical protein                 |
| NCU00552.2      | MIPS:phytoene dehydrogenase AL-1 (carotenoid biosynthesis protein al-1) BROAD:P            |
| NCU00553.2      | MIPS:related to GTPase-activating protein beta-chimerin BROAD:hypothetical prot            |
| NCU00582.2      | MIPS:related to deoxyribodipyrimidine photo-lyase BROAD:hypothetical protein               |
| NCU00584.2      | MIPS:conserved hypothetical protein BROAD:predicted protein                                |
| NCU00585.2      | MIPS:geranylgeranyl-diphosphate geranylgeranyltransferase (AL-2) BROAD:PHYTOENE            |
| NCU00720.2      | MIPS:probable L-lactate dehydrogenase BROAD:hypothetical protein                           |
| NCU00939.2      | MIPS:conserved hypothetical protein BROAD:hypothetical protein                             |
| NCU00999.1      | MIPS:NULL BROAD:predicted protein                                                          |
| NCU01089.2      | MIPS:hypothetical protein BROAD:predicted protein                                          |
| NCU01154.2      | MIPS:related to NsdD protein BROAD:hypothetical protein                                    |
| NCU01243.2      | MIPS:conserved hypothetical protein BROAD:hypothetical protein                             |
| NCU01258.2      | MIPS:probable cyanate lyase BROAD:hypothetical protein                                     |
| NCU01345.2      | MIPS:related to transcription factor atf1+ BROAD:hypothetical protein ( (AL4510            |
| NCU01419.2      | MIPS:probable NADPH quinone oxidoreductase homolog PIG3 BROAD:hypothetical prot            |
| NCU01422.2      | MIPS:probable multiprotein bridging factor MBF1 BROAD:hypothetical protein                 |
| NCU01427.2      | MIPS:farnesyltransferase (al-3) BROAD:GERANYLGERANYL PYROPHOSPHATE SYNTHET                 |
| NCU01797.2      | MIPS:serine/threonine protein kinase NRC-2 BROAD:hypothetical protein                      |
| NCU01844.2      | MIPS:conserved hypothetical protein BROAD:predicted protein                                |
| NCU01847.1      | MIPS:Nuc-2 protein BROAD:hypothetical protein                                              |
| NCU01881.2      | MIPS:hypothetical protein BROAD:predicted protein                                          |

NCU01895.2 MIPS:related to response regulator Mcs4 BROAD:hypothetical protein  
NCU01997.2 MIPS:conserved hypothetical protein BROAD:hypothetical protein  
NCU02190.2 MIPS:related to KES1 protein BROAD:hypothetical protein  
NCU02191.2 MIPS:conserved hypothetical protein BROAD:hypothetical protein  
NCU02203.2 MIPS:conserved hypothetical protein BROAD:hypothetical protein  
NCU02264.2 MIPS:related to prefoldin subunit 3 BROAD:hypothetical protein  
NCU02265.2 MIPS:period clock protein FRQ BROAD:FREQUENCY CLOCK PROTEIN  
NCU02356.2 MIPS:white collar 1 protein BROAD:WHITE COLLAR 1 PROTEIN (WC1)  
NCU02375.2 MIPS:related to ubiquitin-specific protease 22 BROAD:hypothetical protein  
NCU02691.2 MIPS:hypothetical protein BROAD:predicted protein  
NCU02713.2 MIPS:related to transcriptional repressor BROAD:hypothetical protein  
NCU02771.2 MIPS:probable uroporphyrinogen decarboxylase BROAD:hypothetical protein  
NCU02801.2 MIPS:related to benzodiazepine receptor, peripheral-type BROAD:hypothetical pro  
NCU02819.2 MIPS:related to nonhistone chromosomal protein BROAD:hypothetical protein  
NCU02887.2 MIPS:probable potassium channel beta subunit protein BROAD:hypothetical protein  
NCU02888.2 MIPS:conserved hypothetical protein BROAD:hypothetical protein  
NCU02945.2 MIPS:hypothetical protein BROAD:predicted protein  
NCU02948.2 MIPS:probable 1,4-Benzoquinone reductase BROAD:hypothetical protein  
NCU03071.2 MIPS:related to MAP kinase kinase kinase Wis4 BROAD:hypothetical protein  
NCU03072.2 MIPS:hypothetical protein BROAD:predicted protein  
NCU03151.2 MIPS:probable peroxisomal membrane protein BROAD:hypothetical protein  
NCU03188.2 MIPS:related to D-arabinono-1,4-lactone oxidase BROAD:hypothetical protein  
NCU03312.2 MIPS:conserved hypothetical protein BROAD:hypothetical protein  
NCU03341.2 MIPS:related to protein transport protein SEC6 BROAD:hypothetical protein  
NCU03602.2 MIPS:conserved hypothetical protein BROAD:hypothetical protein  
NCU03699.2 MIPS:conserved hypothetical protein BROAD:hypothetical protein  
NCU03967.2 MIPS:vivid PAS protein VVD BROAD:hypothetical protein ( (AF338412) vivid PAS pr  
NCU03968.2 MIPS:related to DNA repair protein MMS21 BROAD:predicted protein  
NCU04091.2 MIPS:hypothetical protein BROAD:predicted protein  
NCU04174.2 MIPS:conserved hypothetical protein BROAD:hypothetical protein  
NCU04179.2 MIPS:related to finger protein AZF1 BROAD:hypothetical protein ( (AL451015) rel  
NCU04274.2 MIPS:related to Sts1 protein BROAD:hypothetical protein ( (AL513462) related to  
NCU04295.2 MIPS:conserved hypothetical protein BROAD:hypothetical protein ( (AL451109) con

NCU04371.2 MIPS:probable peptidylprolyl isomerase (FK506-binding protein homolog) BROAD:pr  
NCU04452.2 MIPS:probable NADPH2 dehydrogenase chain OYE2 BROAD:hypothetical protein  
NCU04637.2 MIPS:probable RVS167 protein BROAD:hypothetical protein  
NCU04801.2 MIPS:hypothetical protein BROAD:hypothetical protein  
NCU05007.2 MIPS:conserved hypothetical protein BROAD:hypothetical protein  
NCU05594.2 MIPS:conserved hypothetical protein BROAD:hypothetical protein  
NCU05683.2 MIPS:probable dihydroxy-acid dehydratase BROAD:hypothetical protein  
NCU05721.2 MIPS:conserved hypothetical protein BROAD:hypothetical protein  
NCU05785.2 MIPS:probable calcium-related spray protein BROAD:hypothetical protein  
NCU05786.2 MIPS:NULL BROAD:predicted protein  
NCU06095.2 MIPS:related to transcription factor BOM BROAD:hypothetical protein  
NCU06203.2 MIPS:putative protein BROAD:predicted protein  
NCU06218.2 MIPS:conserved hypothetical protein BROAD:hypothetical protein  
NCU06306.2 MIPS:related to proliferation associated SNF2-like protein BROAD:hypothetical p  
NCU06420.2 MIPS:putative protein BROAD:predicted protein  
NCU06549.2 MIPS:Sno-type pyridoxine vitamin B6 biosynthetic protein SNO1 BROAD:hypothetica  
NCU06554.2 MIPS:conserved hypothetical protein BROAD:hypothetical protein ( (AF309689) put  
NCU06603.2 MIPS:related to NonF protein, involved in nonactin biosynthesis BROAD:hypotheti  
NCU06662.2 MIPS:conserved hypothetical protein BROAD:hypothetical protein  
NCU06751.2 MIPS:conserved hypothetical protein BROAD:hypothetical protein  
NCU06915.2 MIPS:hypothetical protein BROAD:predicted protein  
NCU07024.2 MIPS:osmotic sensitive-2 protein (putative mitogen-activated protein (MAP) kinas  
NCU07159.2 MIPS:probable endopeptidase K BROAD:hypothetical protein  
NCU07221.2 MIPS:related to histidine kinase tcsA protein BROAD:hypothetical protein  
NCU07264.2 MIPS:probable ubiquitin-conjugating enzyme E2 BROAD:hypothetical protein  
NCU07267.2 MIPS:blue-light-inducible Bli-3 protein BROAD:BLI-3 PROTEIN  
NCU07296.2 MIPS:serine/threonine protein kinase COT-1 BROAD:hypothetical protein  
NCU07325.2 MIPS:conidation-specific protein CON-10 BROAD:hypothetical protein  
NCU07434.2 MIPS:related to short chain dehydrogenase BROAD:hypothetical protein  
NCU07541.2 MIPS:hypothetical protein BROAD:predicted protein  
NCU07584.2 MIPS:related to vacuolar segregation protein PEP7 BROAD:hypothetical protein  
NCU07585.2 MIPS:related to siroheme synthase BROAD:hypothetical protein  
NCU07649.2 MIPS:NULL BROAD:hypothetical protein

NCU07675.2 MIPS:putative protein BROAD:predicted protein  
NCU07962.2 MIPS:putative protein BROAD:predicted protein  
NCU07971.2 MIPS:conserved hypothetical protein BROAD:hypothetical protein  
NCU08133.2 MIPS:related to carbonate dehydratase BROAD:hypothetical protein  
NCU08280.2 MIPS:related to squalene monooxygenase BROAD:hypothetical protein  
NCU08290.2 MIPS:related to ATP-dependent DNA helicase II, 70 kDa subunit BROAD:hypothetica  
NCU08291.2 MIPS:probable ferrocyclase BROAD:hypothetical protein  
NCU08626.2 MIPS:deoxyribodipyrimidine photo-lyase PHR BROAD:DEOXYRIBODIPYRIMIDINE PHOTOLYA  
NCU08674.2 MIPS:conserved hypothetical protein BROAD:hypothetical protein  
NCU08699.2 MIPS:alcohol dehydrogenase homolog Bli-4 BROAD:PUTATIVE OXIDOREDUCTASE BLI-4 PR  
NCU08769.2 MIPS:conidiation protein 6 (con-6) BROAD:CONIDIATION-SPECIFIC PROTEIN 6  
NCU08824.2 MIPS:NULL BROAD:hypothetical protein  
NCU08850.2 MIPS:UV-endonuclease UVE-1 BROAD:hypothetical protein ( D11392) UV-endonucleas  
NCU09079.2 MIPS:conserved hypothetical protein BROAD:hypothetical protein  
NCU09115.2 MIPS:related to cytochrome P450 52A12; alkane hydroxylase 1 BROAD:hypothetical  
NCU09141.2 MIPS:probable pyridoxine 4-dehydrogenase BROAD:hypothetical protein  
NCU09201.2 MIPS:hypothetical protein BROAD:predicted protein  
NCU09306.2 MIPS:related to beta-carotene 15,15'-dioxygenase BROAD:hypothetical protein  
NCU09502.2 MIPS:hypothetical protein BROAD:predicted protein  
NCU09534.2 MIPS:probable glutathione peroxidase BROAD:hypothetical protein  
NCU09535.2 MIPS:conserved hypothetical protein BROAD:hypothetical protein  
NCU09715.2 MIPS:probable trehalose-6-phosphate synthase subunit 1 BROAD:hypothetical prote  
NCU09723.2 MIPS:hypothetical protein BROAD:predicted protein  
NCU09820.2 MIPS:related to protein YBT1 (bile acid transporter) BROAD:hypothetical protein  
NCU09830.2 MIPS:probable ATP-binding cassette multidrug transport protein; ABC transporter  
NCU09841.2 MIPS:related to low molecular weight phosphotyrosine protein phosphatase BROAD:  
NCU09883.2 MIPS:hypothetical protein BROAD:predicted protein  
NCU09937.2 MIPS:conserved hypothetical protein BROAD:hypothetical protein ( hypothetical p  
NCU10011.2 MIPS:related to cytochrome P450 (CYP94A1) BROAD:hypothetical protein  
NCU10063.2 MIPS:NULL BROAD:hypothetical protein  
NCU10880.2 MIPS:related to phosphoserine phosphatase fcp1 BROAD:hypothetical protein

Suppl. Table-III Gene list of late light responsive genes

| Gene ID    | Annotation                                                                      |
|------------|---------------------------------------------------------------------------------|
| 4nc630_150 | MIPS:putative protein BROAD:NULL                                                |
| NCU00111.2 | MIPS:putative protein BROAD:predicted protein                                   |
| NCU00132.2 | MIPS:hypothetical protein BROAD:predicted protein                               |
| NCU00281.2 | MIPS:probable sterol glucosyltransferase BROAD:hypothetical protein             |
| NCU00299.2 | MIPS:related to delta3-cis-delta2-trans-enoyl-CoA isomerase BROAD:hypothetical  |
| NCU00322.2 | MIPS:putative protein BROAD:predicted protein                                   |
| NCU00401.2 | MIPS:conserved hypothetical protein BROAD:predicted protein                     |
| NCU00513.2 | MIPS:conserved hypothetical protein BROAD:hypothetical protein                  |
| NCU00575.2 | MIPS:probable glucokinase BROAD:hypothetical protein                            |
| NCU00586.2 | MIPS:conserved hypothetical protein BROAD:predicted protein                     |
| NCU00766.2 | MIPS:conserved hypothetical protein BROAD:predicted protein                     |
| NCU00790.2 | MIPS:potassium transporter hak-1 BROAD:hypothetical protein ( (AJ009759) potass |
| NCU00793.2 | MIPS:related to alpha,alpha-trehalose-phosphate synthase (UDP-forming) BROAD:hy |
| NCU00838.2 | MIPS:related to dehydroshikimate dehydratase BROAD:hypothetical protein         |
| NCU00884.2 | MIPS:related to wound-inducible protein AWI 31 BROAD:hypothetical protein       |
| NCU01107.2 | MIPS:related to light induced alcohol dehydrogenase Bli-4 BROAD:hypothetical pr |
| NCU01117.2 | MIPS:NULL BROAD:hypothetical protein ( hypothetical protein 13E11.320 [imported |
| NCU01510.2 | MIPS:conserved hypothetical protein BROAD:hypothetical protein ( (AL355932) con |
| NCU01539.2 | MIPS:conserved hypothetical protein BROAD:hypothetical protein                  |
| NCU01555.2 | MIPS:putative protein BROAD:hypothetical protein ( (AL451012) putative protein  |
| NCU01636.2 | MIPS:related to glutathione s-transferase subunit 13 BROAD:hypothetical protein |
| NCU01763.2 | MIPS:related to endozepine BROAD:hypothetical protein ( endozepine related prot |
| NCU01767.2 | MIPS:related to Type 2C Protein Phosphatase BROAD:Type 2C Protein Phosphatase r |
| NCU01768.2 | MIPS:conserved hypothetical protein BROAD:hypothetical protein ( hypothetical p |
| NCU01815.2 | MIPS:related to CYTOCHROME B561 BROAD:predicted protein                         |
| NCU01861.2 | MIPS:related to NAD(P)H-dependent oxidoreductase BROAD:hypothetical protein     |
| NCU01904.2 | MIPS:related to 2-deoxy-D-gluconate 3-dehydrogenase BROAD:hypothetical protein  |
| NCU01905.2 | MIPS:related to NAD-dependent sorbitol dehydrogenase BROAD:hypothetical protein |
| NCU01906.2 | MIPS:probable aldehyde reductase BROAD:hypothetical protein                     |
| NCU02124.2 | MIPS:conserved hypothetical protein BROAD:hypothetical protein                  |
| NCU02287.2 | MIPS:probable acyl-CoA dehydrogenase BROAD:hypothetical protein                 |

NCU02322.2 MIPS:related to mannose-6-phosphate isomerase BROAD:hypothetical protein  
NCU02397.2 MIPS:probable pyruvate decarboxylase BROAD:hypothetical protein  
NCU02512.2 MIPS:hypothetical protein BROAD:predicted protein  
NCU02513.2 MIPS:conserved hypothetical protein BROAD:hypothetical protein  
NCU02540.2 MIPS:conserved hypothetical protein BROAD:hypothetical protein  
NCU02579.2 MIPS:conserved hypothetical protein BROAD:predicted protein  
NCU02596.2 MIPS:putative protein BROAD:predicted protein  
NCU02599.2 MIPS:related to yeast endoplasmic reticulum 25 kDa transmembrane protein BROAD:  
NCU02712.2 MIPS:related to acetate kinase BROAD:hypothetical protein  
NCU02765.2 MIPS:conserved hypothetical protein BROAD:predicted protein  
NCU02906.2 MIPS:probable malate dehydrogenase (oxaloacetate decarboxylating) (NADP+) BROAD  
NCU03214.2 MIPS:related to endoplasmic reticulum retention receptor BROAD:hypothetical pro  
NCU03290.2 MIPS:related to secreted dipeptidyl-peptidase V precursor BROAD:hypothetical pr  
NCU03357.2 MIPS:related to ubiquitin fusion degradation protein 2 BROAD:hypothetical prote  
NCU03358.2 MIPS:conserved hypothetical protein BROAD:hypothetical protein  
NCU03378.2 MIPS:related to tol protein BROAD:hypothetical protein  
NCU03415.2 MIPS:probable aldehyde dehydrogenase BROAD:hypothetical protein  
NCU03460.2 MIPS:probable cis-prenyltransferase BROAD:hypothetical protein  
NCU03617.2 MIPS:conserved hypothetical protein BROAD:hypothetical protein ( (AL513444) con  
NCU03685.2 MIPS:related to glucan 1,4-alpha-glucosidase BROAD:hypothetical protein ( (AL35  
NCU03731.2 MIPS:conserved hypothetical protein BROAD:hypothetical protein ( (AL513467) con  
NCU03779.2 MIPS:probable glycerone kinase isoform BROAD:hypothetical protein ( (AL513466)  
NCU03780.2 MIPS:hypothetical protein BROAD:hypothetical protein  
NCU03803.2 MIPS:related to SORBITOL UTILIZATION PROTEIN SOU1 BROAD:hypothetical protein (  
NCU04071.2 MIPS:carboxy-cis,cis-muconate cyclase BROAD:CARBOXY-CIS,CIS-MUCONATE CYCLASE (3  
NCU04265.2 MIPS:related to beta-fructofuranosidase BROAD:related to beta-fructofuranosidas  
NCU04266.2 MIPS:putative protein BROAD:hypothetical protein ( (AL513462) putative protein  
NCU04342.2 MIPS:conserved hypothetical protein BROAD:hypothetical protein  
NCU04343.2 MIPS:conserved hypothetical protein BROAD:hypothetical protein  
NCU04387.2 MIPS:vacuolar ATP synthase subunit F BROAD:VACUOLAR ATP SYNTHASE SUBUNIT F (V-A  
NCU04415.2 MIPS:related to brefeldin A resistance protein BROAD:hypothetical protein  
NCU04417.2 MIPS:conserved hypothetical protein BROAD:predicted protein  
NCU04460.2 MIPS:probable galactose-1-phosphate uridylyltransferase BROAD:hypothetical prot



NCU04474.2 MIPS:hypothetical protein BROAD:hypothetical protein  
NCU04510.2 MIPS:related to glycerol dehydrogenase BROAD:hypothetical protein  
NCU04605.2 MIPS:hypothetical protein BROAD:predicted protein  
NCU04635.2 MIPS:related to mismatched base pair and cruciform dna recognition protein BROA  
NCU04667.2 MIPS:putative protein BROAD:predicted protein  
NCU04674.2 MIPS:related to alpha-glucosidase b BROAD:hypothetical protein  
NCU04675.2 MIPS:putative protein BROAD:predicted protein  
NCU04676.2 MIPS:conserved hypothetical protein BROAD:hypothetical protein  
NCU04757.2 MIPS:hypothetical protein BROAD:predicted protein  
NCU04796.2 MIPS:probable Acetyl-CoA acyltransferase BROAD:hypothetical protein  
NCU04797.2 MIPS:probable Fructose-1,6-bisphosphatase BROAD:hypothetical protein  
NCU04814.2 MIPS:hypothetical protein BROAD:hypothetical protein  
NCU04823.2 MIPS:probable alcohol dehydrogenase (NADP+) BROAD:hypothetical protein  
NCU04908.2 MIPS:putative protein BROAD:hypothetical protein  
NCU04908.2 MIPS:putative protein BROAD:hypothetical protein  
NCU04921.2 MIPS:conserved hypothetical protein BROAD:predicted protein  
NCU04946.2 MIPS:putative protein BROAD:predicted protein  
NCU04963.2 MIPS:probable monosaccharide transporter BROAD:hypothetical protein  
NCU05061.2 MIPS:hypothetical protein BROAD:predicted protein  
NCU05148.2 MIPS:hypothetical protein BROAD:predicted protein  
NCU05169.2 MIPS:probable catalase isozyme P BROAD:hypothetical protein  
NCU05429.2 MIPS:probable branching enzyme (be1) BROAD:probable branching enzyme [MIPS]  
NCU05490.2 MIPS:hypothetical protein BROAD:predicted protein  
NCU05627.2 MIPS:related to sugar transporter BROAD:hypothetical protein  
NCU05639.2 MIPS:hypothetical protein BROAD:predicted protein  
NCU05652.2 MIPS:NULL BROAD:predicted protein  
NCU05770.2 MIPS:catalase 2 BROAD:hypothetical protein  
NCU05844.2 MIPS:hypothetical protein BROAD:predicted protein  
NCU05850.2 MIPS:conserved hypothetical protein BROAD:hypothetical protein  
NCU05882.2 MIPS:conserved hypothetical protein BROAD:hypothetical protein  
NCU05897.2 MIPS:related to glucose/galactose transporter BROAD:hypothetical protein  
NCU06005.2 MIPS:probable glycerol kinase (ATP:glycerol 3-phosphotransferase) BROAD:hypothe  
NCU06009.2 MIPS:conserved hypothetical protein BROAD:hypothetical protein

NCU06020.2 MIPS:related to extracellular chitinase BROAD:hypothetical protein  
NCU06131.2 MIPS:conserved hypothetical protein BROAD:predicted protein  
NCU06265.2 MIPS:conserved hypothetical protein BROAD:hypothetical protein  
NCU06506.2 MIPS:hypothetical protein BROAD:predicted protein  
NCU06597.2 MIPS:hypothetical protein BROAD:predicted protein  
NCU06682.2 MIPS:conserved hypothetical protein BROAD:predicted protein  
NCU06977.2 MIPS:putative protein BROAD:predicted protein  
NCU07061.2 MIPS:putative protein BROAD:predicted protein  
NCU07064.2 MIPS:conserved hypothetical protein BROAD:hypothetical protein  
NCU07082.2 MIPS:related to aspartate-tRNA ligase, cytosolic BROAD:hypothetical protein  
NCU07119.2 MIPS:related to non-ribosomal peptide synthetase BROAD:hypothetical protein  
NCU07120.2 MIPS:conserved hypothetical protein BROAD:hypothetical protein  
NCU07142.2 MIPS:putative protein BROAD:predicted protein  
NCU07232.2 MIPS:related to heat shock protein 30 BROAD:hypothetical protein  
NCU07273.2 MIPS:putative protein BROAD:predicted protein  
NCU07332.2 MIPS:related to ACB 4-hydroxyacetophenone monooxygenase BROAD:hypothetical prot  
NCU07338.2 MIPS:related to alpha-1,6-mannosyltransferase HOC1 BROAD:hypothetical protein  
NCU07424.2 MIPS:hypothetical protein BROAD:predicted protein  
NCU07441.2 MIPS:hypothetical protein BROAD:predicted protein  
NCU07453.2 MIPS:hypothetical protein BROAD:predicted protein  
NCU07661.2 MIPS:hypothetical protein BROAD:predicted protein  
NCU07723.2 MIPS:probable norsolorinic acid reductase BROAD:hypothetical protein  
NCU07745.2 MIPS:putative protein BROAD:predicted protein  
NCU07921.2 MIPS:hypothetical protein BROAD:predicted protein  
NCU08057.2 MIPS:related to tropinone reductase BROAD:hypothetical protein  
NCU08064.2 MIPS:conserved hypothetical protein BROAD:hypothetical protein  
NCU08070.2 MIPS:conserved hypothetical protein BROAD:hypothetical protein  
NCU08095.2 MIPS:hypothetical protein BROAD:predicted protein  
NCU08127.2 MIPS:related to DFG5 protein BROAD:hypothetical protein  
NCU08190.2 MIPS:conserved hypothetical protein BROAD:hypothetical protein  
NCU08224.2 MIPS:hypothetical protein BROAD:predicted protein  
NCU08440.2 MIPS:conserved hypothetical protein BROAD:predicted protein  
NCU08501.2 MIPS:related to TOM1 protein BROAD:related to TOM1 protein [MIPS]

NCU08549.2 MIPS:related to UDP-glucose 4-epimerase BROAD:hypothetical protein  
NCU08677.2 MIPS:hypothetical protein BROAD:predicted protein  
NCU08791.2 MIPS:catalase-1 BROAD:hypothetical protein ( (AY027545) Catalase-1 [Neurospora  
NCU08922.2 MIPS:hypothetical protein BROAD:predicted protein  
NCU08949.2 MIPS:conserved hypothetical protein BROAD:hypothetical protein  
NCU09041.2 MIPS:probable L-xylulose reductase BROAD:hypothetical protein  
NCU09043.2 MIPS:related to calcium-binding protein caleosin BROAD:hypothetical protein  
NCU09051.2 MIPS:related to formaldehyde dehydrogenase BROAD:hypothetical protein  
NCU09057.2 MIPS:putative protein BROAD:hypothetical protein  
NCU09266.2 MIPS:probable methylmalonate-semialdehyde dehydrogenase (acylating) BROAD:hypot  
NCU09290.2 MIPS:probable proteasome endopeptidase complex chain PRE3; 20S proteasome subuni  
NCU09526.2 MIPS:putative protein BROAD:predicted protein  
NCU09532.2 MIPS:related to dihydrodipicolinate synthase BROAD:hypothetical protein  
NCU09533.2 MIPS:conserved hypothetical protein BROAD:predicted protein  
NCU09553.2 MIPS:probable 3-hydroxybutyryl-CoA dehydrogenase BROAD:hypothetical protein  
NCU09560.2 MIPS:probable superoxide dismutase (Mn) precursor BROAD:hypothetical protein  
NCU09646.2 MIPS:strong similarity to acetyl-CoA C-acyltransferase, peroxisomal BROAD:hypot  
NCU09692.2 MIPS:related to diacylglycerol pyrophosphate phosphatase DPP1 BROAD:hypothetica  
NCU09714.2 MIPS:hypothetical protein BROAD:predicted protein  
NCU09716.2 MIPS:hypothetical protein BROAD:predicted protein  
NCU09783.2 MIPS:NULL BROAD:hypothetical protein  
NCU09821.2 MIPS:conserved hypothetical protein BROAD:hypothetical protein  
NCU09931.2 MIPS:conserved hypothetical protein BROAD:hypothetical protein ( hypothetical p  
NCU09992.2 MIPS:conserved hypothetical protein BROAD:hypothetical protein  
NCU10021.2 MIPS:related to monosaccharide H+ symporter (fragment) BROAD:hypothetical prote  
NCU10360.2 MIPS:conserved hypothetical protein BROAD:hypothetical protein  
NCU10656.2 MIPS:related to alcohol dehydrogenase BROAD:hypothetical protein  
NCU10997.2 MIPS:con-8 protein BROAD:hypothetical protein  
NCU11090.2 MIPS:related to salicylate 1-monooxygenase (flavoprotein monooxygenase) BROAD:p  
xnc105\_090 MIPS:probable exochitinase BROAD:NULL

## Supplementary Table IV- Identification of known light-responsive genes

| Gene Name     | Gene Function                      | NCU no.    | Early or late light response? |
|---------------|------------------------------------|------------|-------------------------------|
| <i>wc-1</i>   | Blue light photoreceptor & TF      | NCU02356.2 | Early                         |
| <i>vvd</i>    | Blue light photoreceptor           | NCU03967.2 | Early                         |
| <i>cry</i>    | Potential blue light photoreceptor | NCU00582.2 | Early                         |
| <i>frq</i>    | Clock protein                      | NCU02265.2 | Early                         |
| <i>al-1</i>   | Phytoene desaturase                | NCU00552.2 | Early                         |
| <i>al-2</i>   | Phytoene synthetase                | NCU00585.2 | Early                         |
| <i>al-3</i>   | GGPP synthase                      | NCU01427.2 | Early                         |
| <i>ccg-2</i>  | Hydrophobin                        | NCU08457.2 | Late in WT                    |
| <i>con-6</i>  | Unknown                            | NCU08769.2 | Early                         |
| <i>con-8</i>  | Unknown                            | NCU10997.2 | Early                         |
| <i>con-10</i> | Unknown                            | NCU03967.2 | Early                         |
| <i>Bli-3</i>  | Unknown                            | NCU07267.2 | Early                         |
| <i>Bli-4</i>  | Unknown                            | NCU08699.2 | Early                         |

| Suppl. Table-V       |             |                         |                        |
|----------------------|-------------|-------------------------|------------------------|
| Gene ID              | Gene Symbol | 5'-primer               | 3'-primer              |
| NCU02356.2           | wc-1        | tcagcagcatcagttcaacc    | gttgatgttcgcccattct    |
| NCU04173.2           | actin       | gtccccgcatcatggatc      | cttctccatgtcgtcccagt   |
| NCU01154.2           | sub-1       | gaagaacctccgacacctca    | ctttctatgccgtcaccat    |
| NCU02713.2           | csp-1       | catctaccggccattctta     | ccccaggtgtgagtggtagt   |
| NCU04179.2           | sah-1       | atggcttcccagtacctct     | gactaggaccctggtgatgg   |
| NCU06407.2           | vad-3       | cggtcttgaggagcattag     | atgatgcatccctccatt     |
| NCU03643.2           | null        | atacaccgcgtatgaggag     | cttctacggcttcaggatcg   |
| NCU01107.2           | null        | gttctgggtcaggctctctg    | tctcccccttgacgtgtag    |
| NCU06597.2           | null        | agcagcctaccacctca       | cttctgccagtctcattcc    |
| NCU03967.2           | vvd         | cgatgaggaaagcgattgat    | cccattgctgtaccggtattc  |
| NCU00582.2           | cry         | cttgacagcctccaaagag     | gatggcttgtggtcaagggt   |
| NCU02265.2           | frq         | tggctcggataagaatggc     | atgaaaggtgtccgaagggt   |
| NCU01555.2           | null        | agcctacgagaagcacaagc    | cttgacgttctcctcgtgt    |
| NCU02765.2           | null        | cactacaagggaacaacga     | cttgtgggtggtgaagacct   |
| NCU00309.2           | null        | agcctactgatgctgccact    | cgaatgattccgctgagaac   |
| NCU09535.2           | null        | ggagaggggtccgcttatag    | aatgtccgcactcttggct    |
| NCU00859.2           | null        | aacgaggaggccgataagat    | aaaaccgtgttcgcaaaact   |
| NCU04533.2           | null        | gagacgagtatgggctggtc    | cggtgtcctgttccactca    |
| NCU08455.2           | null        | gacaagcgacgaaacgtaca    | acggatctcttgatttgg     |
| NCU09209.2           | null        | ctggatgctgttgcattgg     | agggatattgcctctgctca   |
| Luciferase           | null        | ctccctccagttcttcatgc    | ggagcttcttggacgttg     |
| ChIP-sub-1 ELRE      | null        | gaccggaccgaaggcgtggcctc | gctgccaaccagacagagagag |
| ChIP-frq PLRE        | null        | cggacgacggctggccaattag  | tcgtgctcttctgctcatttc  |
| ChIP-3.303           | null        | gccaaaggaagacagagaaacg  | ggtacatcccgtacatgtgg   |
| ChIP-sub-1 ELRE-QPCR | null        | actcgtcaccaactccatc     | gccaaaccagacagagagag   |
| ChIP-frq PLRE-QPCR   | null        | cgagaggacctgaactt       | acgttggtgcgaatagagg    |

| Suppl. Table-VI<br>Gene ID | Gene list of total light responsive genes identified by SAM<br>Annotation       |
|----------------------------|---------------------------------------------------------------------------------|
| NCU08769.2                 | MIPS:conidiation protein 6 (con-6) BROAD:CONIDIATION-SPECIFIC PROTEIN 6         |
| NCU00585.2                 | MIPS:geranylgeranyl-diphosphate geranylgeranyltransferase (AL-2) BROAD:PHYTOENE |
| NCU00552.2                 | MIPS:phytoene dehydrogenase AL-1 (carotenoid biosynthesis protein al-1) BROAD:P |
| NCU08291.2                 | MIPS:probable ferrochelatae BROAD:hypothetical protein                          |
| NCU09141.2                 | MIPS:probable pyridoxine 4-dehydrogenase BROAD:hypothetical protein             |
| NCU00582.2                 | MIPS:related to deoxyribodipyrimidine photo-lyase BROAD:hypothetical protein    |
| NCU07267.2                 | MIPS:blue-light-inducible Bli-3 protein BROAD:BLI-3 PROTEIN                     |
| NCU04452.2                 | MIPS:probable NADPH2 dehydrogenase chain OYE2 BROAD:hypothetical protein        |
| NCU09051.2                 | MIPS:related to formaldehyde dehydrogenase BROAD:hypothetical protein           |
| NCU06597.2                 | MIPS:hypothetical protein BROAD:predicted protein                               |
| NCU07585.2                 | MIPS:related to siroheme synthase BROAD:hypothetical protein                    |
| NCU06420.2                 | MIPS:putative protein BROAD:predicted protein                                   |
| NCU08791.2                 | MIPS:catalase-1 BROAD:hypothetical protein ( (AY027545) Catalase-1 [Neurospora  |
| NCU09306.2                 | MIPS:related to beta-carotene 15,15'-dioxygenase BROAD:hypothetical protein     |
| NCU01861.2                 | MIPS:related to NAD(P)H-dependent oxidoreductase BROAD:hypothetical protein     |
| NCU10063.2                 | MIPS:NULL BROAD:hypothetical protein                                            |
| NCU01107.2                 | MIPS:related to light induced alcohol dehydrogenase Bli-4 BROAD:hypothetical pr |
| NCU02801.2                 | MIPS:related to benzodiazepine receptor, peripheral-type BROAD:hypothetical pro |
| NCU03967.2                 | MIPS:vivid PAS protein VVD BROAD:hypothetical protein ( (AF338412) vivid PAS pr |
| NCU02596.2                 | MIPS:putative protein BROAD:predicted protein                                   |
| NCU09534.2                 | MIPS:probable glutathione peroxidase BROAD:hypothetical protein                 |
| NCU00838.2                 | MIPS:related to dehydroshikimate dehydratase BROAD:hypothetical protein         |
| NCU02190.2                 | MIPS:related to KES1 protein BROAD:hypothetical protein                         |
| NCU08699.2                 | MIPS:alcohol dehydrogenase homolog Bli-4 BROAD:PUTATIVE OXIDOREDUCTASE BLI-4 PR |
| NCU09821.2                 | MIPS:conserved hypothetical protein BROAD:hypothetical protein                  |
| NCU02322.2                 | MIPS:related to mannose-6-phosphate isomerase BROAD:hypothetical protein        |
| NCU06915.2                 | MIPS:hypothetical protein BROAD:predicted protein                               |
| NCU05652.2                 | MIPS:NULL BROAD:predicted protein                                               |

NCU04823.2 MIPS:probable alcohol dehydrogenase (NADP+) BROAD:hypothetical protein  
NCU07962.2 MIPS:putative protein BROAD:predicted protein  
NCU02265.2 MIPS:period clock protein FRQ BROAD:FREQUENCY CLOCK PROTEIN  
NCU09535.2 MIPS:conserved hypothetical protein BROAD:hypothetical protein  
NCU10997.2 MIPS:con-8 protein BROAD:hypothetical protein  
NCU03151.2 MIPS:probable peroxisomal membrane protein BROAD:hypothetical protein  
NCU05844.2 MIPS:hypothetical protein BROAD:predicted protein  
NCU02397.2 MIPS:probable pyruvate decarboxylase BROAD:hypothetical protein  
NCU07082.2 MIPS:related to aspartate-tRNA ligase, cytosolic BROAD:hypothetical protein  
NCU00360.2 MIPS:conserved hypothetical protein BROAD:hypothetical protein  
NCU09533.2 MIPS:conserved hypothetical protein BROAD:predicted protein  
NCU08824.2 MIPS:NULL BROAD:hypothetical protein  
NCU08626.2 MIPS:deoxyribodipyrimidine photo-lyase PHR BROAD:DEOXYRIBODIPYRIMIDINE PHOTOLYA  
NCU00884.2 MIPS:related to wound-inducible protein AWI 31 BROAD:hypothetical protein  
NCU08850.2 MIPS:UV-endonuclease UVE-1 BROAD:hypothetical protein ( (D11392) UV-endonucleas  
NCU03780.2 MIPS:hypothetical protein BROAD:hypothetical protein  
NCU04371.2 MIPS:probable peptidylprolyl isomerase (FK506-binding protein homolog) BROAD:pr  
NCU04179.2 MIPS:related to finger protein AZF1 BROAD:hypothetical protein ( (AL451015) rel  
NCU05148.2 MIPS:hypothetical protein BROAD:predicted protein  
NCU02713.2 MIPS:related to transcriptional repressor BROAD:hypothetical protein  
NCU07159.2 MIPS:probable endopeptidase K BROAD:hypothetical protein  
NCU07325.2 MIPS:conidation-specific protein CON-10 BROAD:hypothetical protein  
NCU01258.2 MIPS:probable cyanate lyase BROAD:hypothetical protein  
NCU07273.2 MIPS:putative protein BROAD:predicted protein  
NCU02948.2 MIPS:probable 1,4-Benzoquinone reductase BROAD:hypothetical protein  
NCU04908.2 MIPS:putative protein BROAD:hypothetical protein  
NCU02124.2 MIPS:conserved hypothetical protein BROAD:hypothetical protein  
NCU02771.2 MIPS:probable uroporphyrinogen decarboxylase BROAD:hypothetical protein  
NCU07661.2 MIPS:hypothetical protein BROAD:predicted protein  
NCU08949.2 MIPS:conserved hypothetical protein BROAD:hypothetical protein

NCU09057.2 MIPS:putative protein BROAD:hypothetical protein  
NCU05850.2 MIPS:conserved hypothetical protein BROAD:hypothetical protein  
NCU00939.2 MIPS:conserved hypothetical protein BROAD:hypothetical protein  
NCU00999.1 MIPS:NULL BROAD:predicted protein  
NCU01555.2 MIPS:putative protein BROAD:hypothetical protein (AL451012) putative protein  
NCU04266.2 MIPS:putative protein BROAD:hypothetical protein (AL513462) putative protein  
NCU09043.2 MIPS:related to calcium-binding protein caleosin BROAD:hypothetical protein  
NCU04605.2 MIPS:hypothetical protein BROAD:predicted protein  
NCU04417.2 MIPS:conserved hypothetical protein BROAD:predicted protein  
NCU00322.2 MIPS:putative protein BROAD:predicted protein  
NCU05770.2 MIPS:catalase 2 BROAD:hypothetical protein  
NCU02356.2 MIPS:white collar 1 protein BROAD:WHITE COLLAR 1 PROTEIN (WC1)  
NCU06554.2 MIPS:conserved hypothetical protein BROAD:hypothetical protein (AF309689) put  
NCU02819.2 MIPS:related to nonhistone chromosomal protein BROAD:hypothetical protein  
NCU06265.2 MIPS:conserved hypothetical protein BROAD:hypothetical protein  
NCU07332.2 MIPS:related to ACB 4-hydroxyacetophenone monooxygenase BROAD:hypothetical prot  
NCU03731.2 MIPS:conserved hypothetical protein BROAD:hypothetical protein (AL513467) con  
NCU11090.2 MIPS:related to salicylate 1-monooxygenase (flavoprotein monooxygenase) BROAD:p  
NCU09532.2 MIPS:related to dihydrodipicolinate synthase BROAD:hypothetical protein  
NCU01510.2 MIPS:conserved hypothetical protein BROAD:hypothetical protein (AL355932) con  
NCU09041.2 MIPS:probable L-xylulose reductase BROAD:hypothetical protein  
NCU09992.2 MIPS:conserved hypothetical protein BROAD:hypothetical protein  
NCU03968.2 MIPS:related to DNA repair protein MMS21 BROAD:predicted protein  
NCU00720.2 MIPS:probable L-lactate dehydrogenase BROAD:hypothetical protein  
NCU07061.2 MIPS:putative protein BROAD:predicted protein  
NCU00859.2 MIPS:putative protein BROAD:hypothetical protein  
NCU00586.2 MIPS:conserved hypothetical protein BROAD:predicted protein  
NCU07541.2 MIPS:hypothetical protein BROAD:predicted protein  
NCU04667.2 MIPS:putative protein BROAD:predicted protein  
NCU05882.2 MIPS:conserved hypothetical protein BROAD:hypothetical protein



NCU01451.2 MIPS:related to HETEROGENEOUS NUCLEAR RIBONUCLEOPROTEIN G BROAD:predicted prote  
NCU02765.2 MIPS:conserved hypothetical protein BROAD:predicted protein  
NCU00236.2 MIPS:conserved hypothetical protein BROAD:hypothetical protein  
NCU07434.2 MIPS:related to short chain dehydrogenase BROAD:hypothetical protein  
NCU08057.2 MIPS:related to tropinone reductase BROAD:hypothetical protein  
NCU04295.2 MIPS:conserved hypothetical protein BROAD:hypothetical protein ( (AL451109) con  
NCU00766.2 MIPS:conserved hypothetical protein BROAD:predicted protein  
NCU00111.2 MIPS:putative protein BROAD:predicted protein  
NCU00244.2 MIPS:related to galactinol synthase BROAD:hypothetical protein  
NCU07745.2 MIPS:putative protein BROAD:predicted protein  
xnc105\_090 MIPS:probable exochitinase BROAD:NULL  
NCU04908.2 MIPS:putative protein BROAD:hypothetical protein  
NCU03071.2 MIPS:related to MAP kinase kinase kinase Wis4 BROAD:hypothetical protein  
NCU09883.2 MIPS:hypothetical protein BROAD:predicted protein  
NCU04415.2 MIPS:related to brefeldin A resistance protein BROAD:hypothetical protein  
NCU09715.2 MIPS:probable trehalose-6-phosphate synthase subunit 1 BROAD:hypothetical prote  
NCU04510.2 MIPS:related to glycerol dehydrogenase BROAD:hypothetical protein  
NCU09692.2 MIPS:related to diacylglycerol pyrophosphate phosphatase DPP1 BROAD:hypothetica  
NCU08127.2 MIPS:related to DFG5 protein BROAD:hypothetical protein  
NCU07232.2 MIPS:related to heat shock protein 30 BROAD:hypothetical protein  
NCU09830.2 MIPS:probable ATP-binding cassette multidrug transport protein; ABC transporter  
NCU09526.2 MIPS:putative protein BROAD:predicted protein  
NCU01154.2 MIPS:related to NsdD protein BROAD:hypothetical protein  
NCU06131.2 MIPS:conserved hypothetical protein BROAD:predicted protein  
NCU01312.2 MIPS:regulator of conidiation rca-1 BROAD:hypothetical protein ( (AL451021) reg  
NCU07142.2 MIPS:putative protein BROAD:predicted protein  
NCU07120.2 MIPS:conserved hypothetical protein BROAD:hypothetical protein  
NCU09210.2 MIPS:related to peroxidase DyP BROAD:hypothetical protein  
NCU07649.2 MIPS:NULL BROAD:hypothetical protein  
NCU06977.2 MIPS:putative protein BROAD:predicted protein

NCU06506.2 MIPS:hypothetical protein BROAD:predicted protein  
NCU10011.2 MIPS:related to cytochrome P450 (CYP94A1) BROAD:hypothetical protein  
NCU01427.2 MIPS:farnesyltransferase (al-3) BROAD:GERANYLGERANYL PYROPHOSPHATE SYNTHET  
NCU00309.2 MIPS:conserved hypothetical protein BROAD:hypothetical protein  
NCU02540.2 MIPS:conserved hypothetical protein BROAD:hypothetical protein  
NCU07064.2 MIPS:conserved hypothetical protein BROAD:hypothetical protein  
NCU06020.2 MIPS:related to extracellular chitinase BROAD:hypothetical protein  
NCU06294.2 MIPS:hypothetical protein BROAD:hypothetical protein  
NCU05490.2 MIPS:hypothetical protein BROAD:predicted protein  
NCU08549.2 MIPS:related to UDP-glucose 4-epimerase BROAD:hypothetical protein  
NCU02579.2 MIPS:conserved hypothetical protein BROAD:predicted protein  
NCU00401.2 MIPS:conserved hypothetical protein BROAD:predicted protein  
NCU04343.2 MIPS:conserved hypothetical protein BROAD:hypothetical protein  
NCU04533.2 MIPS:related to calcium-dependent cell adhesion molecule-1 BROAD:hypothetical p  
NCU01906.2 MIPS:probable aldehyde reductase BROAD:hypothetical protein  
NCU07723.2 MIPS:probable norsolorinic acid reductase BROAD:hypothetical protein  
NCU00902.2 MIPS:zinc finger protein white collar 2 (wc-2) BROAD:WHITE COLLAR 2 PROTEIN (WC  
NCU09079.2 MIPS:conserved hypothetical protein BROAD:hypothetical protein  
NCU08457.2 MIPS:hydrophobin Ccg-2 BROAD:hypothetical protein  
NCU02122.2 MIPS:conserved hypothetical protein BROAD:hypothetical protein  
NCU08677.2 MIPS:hypothetical protein BROAD:predicted protein  
NCU02712.2 MIPS:related to acetate kinase BROAD:hypothetical protein  
NCU06009.2 MIPS:conserved hypothetical protein BROAD:hypothetical protein  
NCU05721.2 MIPS:conserved hypothetical protein BROAD:hypothetical protein  
NCU09169.2 MIPS:conserved hypothetical protein BROAD:hypothetical protein  
NCU04558.2 MIPS:NULL BROAD:predicted protein  
NCU07605.2 MIPS:conserved hypothetical protein BROAD:hypothetical protein  
NCU06682.2 MIPS:conserved hypothetical protein BROAD:predicted protein  
NCU00281.2 MIPS:probable sterol glucosyltransferase BROAD:hypothetical protein  
NCU07474.2 MIPS:conserved hypothetical protein BROAD:hypothetical protein

|            |                                                   |
|------------|---------------------------------------------------|
| 17e5_350   | MIPS:putative protein BROAD:NULL                  |
| NCU08095.2 | MIPS:hypothetical protein BROAD:predicted protein |
| NCU05639.2 | MIPS:hypothetical protein BROAD:predicted protein |
| NCU09502.2 | MIPS:hypothetical protein BROAD:predicted protein |

## Suppl. Table-VII

## Gene table of total light responsive genes in WT

| Gene ID    | DD        | LL5       | LL10      | LL15      | LL30      | LL45      | LL60      | LL90      | LL120     | LL240     |
|------------|-----------|-----------|-----------|-----------|-----------|-----------|-----------|-----------|-----------|-----------|
| 18a7_160   | -0.062667 | 0.528046  | 0.43767   | 1.219663  | 0.112194  | -0.008442 | 0.538846  | -0.03918  | 0.496841  | -0.042778 |
| 4nc630_150 | 0.380581  | -0.059141 | -0.210876 | 0.735802  | 0.479236  |           | 0.272554  | 0.622483  | 0.342497  | 0.486829  |
| 4nc710_010 | -0.475679 | 0.083503  | 0.290125  | 1.386242  | 1.197458  | 0.93793   | 0.226864  | 0.27032   | -0.394987 | -0.744626 |
| NCU00111.2 | -0.293103 | -0.268343 | -0.473    | 0.379495  | 0.428372  | 0.350967  | 0.855174  | 0.248412  | 0.411339  | -0.125582 |
| NCU00132.2 | 0.056853  | 0.316448  | -0.046993 | 0.254654  | 0.773229  | 0.907489  | 0.300932  | 0.372875  | 0.369292  | 0.108646  |
| NCU00203.2 | -0.429125 | -0.177982 | 0.515485  | 1.853346  | 1.626743  | 0.731667  | 0.471986  | 0.185556  | 0.252059  | -0.065522 |
| NCU00236.2 | -0.437637 | -0.531599 | 0.573613  | 0.099877  | 2.022614  | 1.578363  | 0.759157  | 0.547862  | 0.232222  | 0.115559  |
| NCU00244.2 | -1.313711 | 0.394153  | 0.915683  | 1.701722  | 2.507264  | 0.724895  | 0.932268  | 0.762469  | -0.483033 | -0.414398 |
| NCU00263.2 | -0.219501 | 0.201303  | -0.138533 | 0.849751  | -0.304243 | 0.226387  | -0.556557 | -0.053736 | 0.349577  | 0.670868  |
| NCU00276.2 |           |           |           |           | 1.754867  | 0.725346  | -0.231042 |           | -0.271951 | -0.055009 |
| NCU00281.2 | -0.117314 | 0.108754  | 0.524703  | 1.447089  | 0.764452  | 0.094185  | -0.012081 | 0.501531  | 0.783796  | -0.527193 |
| NCU00299.2 | -0.226814 | -0.229335 | -0.153689 | -0.381068 | 0.064642  | 0.029637  | 0.63938   | 0.388989  | -0.63366  | -0.44919  |
| NCU00309.2 | -0.307942 | -0.411666 | 0.151552  | 0.195879  | 1.386475  | 1.573497  | 0.720918  | 0.940368  | 1.394837  | 0.104263  |
| NCU00322.2 | -0.227248 | -0.977774 | -0.84183  | -0.457586 | -0.900395 | 0.167727  | -0.17614  | 0.309188  | 0.976858  | -0.463198 |
| NCU00326.2 | -0.258545 | 0.110371  | 0.040879  | 0.821045  | 0.534179  | 0.617654  | 0.251196  | 0.424657  | 0.063695  | -0.328489 |
| NCU00360.2 | -1.011227 | -0.363307 | 0.684908  | 1.893399  | 1.903669  | 1.593253  | 0.7292    | 0.745669  | 0.150623  | -0.748795 |
| NCU00401.2 |           | -0.390717 | -0.38976  | 0.619976  | 1.25933   | 0.324977  | -0.247893 | 0.617232  | 0.95523   | 0.302813  |
| NCU00430.2 | -0.161767 | -0.166415 | 0.680989  | 1.035249  | 0.630587  | 0.174529  | -0.156225 | -0.090778 | -0.074019 | -0.048998 |
| NCU00513.2 | 0.246914  | 0.30341   | -0.242407 | -0.576677 | 0.27412   | 0.43274   | 0.176881  | 0.473837  | -0.01535  | 0.090175  |
| NCU00549.2 | -0.409102 | -0.873653 | -0.224641 | -0.293349 | 0.71486   | 0.882045  | 0.218306  | 0.358759  | -0.436357 | -0.358437 |
| NCU00552.2 | -3.869032 | 0.854196  | 3.15975   | 3.840921  | 2.176382  | 2.178923  | 2.54448   | 1.926738  | 0.621255  | -0.180646 |
| NCU00553.2 | -0.156107 | -0.152213 | 1.039425  | -0.05839  | 0.095824  | -0.377949 | -0.033371 | 0.184575  | 0.368776  | 0.430252  |
| NCU00575.2 | 0.194917  | 0.011358  | -0.080514 | -0.303327 | 0.65035   | 0.64905   | 0.565492  | 0.61594   | 0.109458  | 0.114807  |
| NCU00582.2 | -2.812078 | -0.77503  | 1.971475  | 2.254087  | 3.732442  | 2.937512  | 2.323741  | 2.348585  | 2.132701  | 1.729549  |
| NCU00584.2 | -0.52854  | 0.277996  | 1.020835  | 1.905017  | 1.388105  | 0.434508  | -0.044175 | 0.176883  | -0.201692 | -0.651398 |
| NCU00585.2 | -1.416054 | -0.361438 | 1.583757  | 0.318304  | 2.150415  | 2.354239  | 1.820329  | 1.784808  | 0.50521   | 0.99251   |
| NCU00586.2 | -0.623569 | 0.210852  | 0.373799  | 0.157094  | -0.232144 | 0.008318  | -0.221988 | 0.559357  | 0.983886  | -0.209395 |
| NCU00720.2 | -0.379061 | -0.424027 | -0.011774 | 0.597857  | 0.896947  | 0.370319  | -0.132791 | -0.492929 | 0.11217   | -0.400499 |
| NCU00766.2 | -0.492788 | 0.388205  | 0.124627  | 0.421033  | -0.092484 | 0.266313  | 0.292268  | -0.020186 | 0.326841  | -0.442162 |

|            |           |           |           |           |           |           |           |           |           |           |
|------------|-----------|-----------|-----------|-----------|-----------|-----------|-----------|-----------|-----------|-----------|
| NCU00790.2 | -0.120192 | -0.50885  | -0.28505  | 0.415035  | 0.437574  | 0.891448  | -0.019444 | 0.305221  | -0.136173 | -0.347559 |
| NCU00793.2 | -0.531301 | -0.156703 | -0.247518 | -0.422819 | 0.825735  | 0.43664   | 0.155331  | 0.139402  | -0.025071 | -0.645818 |
| NCU00838.2 | -0.664776 | -0.198647 | -0.496479 | -0.066459 | 1.697503  | 1.05655   | 1.330314  | 1.026086  | 0.917746  | 0.263762  |
| NCU00859.2 | -0.271108 | -0.869872 | -0.972036 | -1.102825 | 1.49425   | -0.104266 | 1.026976  | 0.92652   | 0.86385   | 0.342089  |
| NCU00884.2 | -0.099619 | -0.377034 | -0.499186 | 0.06556   | 0.546488  | 0.965709  | 0.684795  | 0.833871  | 0.077449  | -0.56058  |
| NCU00911.2 | -0.135461 | 0.118646  | 0.064834  | -0.329173 | -0.284371 | 0.169327  | -0.18847  | 0.186251  | 0.11869   | -0.212358 |
| NCU00939.2 | -0.788576 | -0.175854 | 0.444372  | 1.065753  | 1.930229  | 0.811409  | 0.970317  | 0.221284  | 0.006687  | -0.36728  |
| NCU00999.1 | -0.928438 | -0.347459 | 1.152068  | 2.054729  | 3.489129  | 1.758113  | 1.082158  | 0.940088  | -0.061042 | -0.838643 |
| NCU01089.2 |           | -0.389407 | 0.355977  | -0.031575 | 1.524754  |           |           | -0.153146 | -0.541158 | -0.032277 |
| NCU01107.2 | -0.795111 | -0.750445 | -0.562553 | 0.63418   | 1.268055  | 1.868788  | 1.544382  | 1.404971  | 0.960606  | -0.343308 |
| NCU01117.2 | -0.038207 | -0.263181 | -0.148659 | 0.483428  | 0.663388  | 0.600812  | -0.512752 | 0.140135  | 0.129842  | 0.229773  |
| NCU01154.2 | -0.432385 | 0.098938  | 0.797528  | 0.839947  | 0.286944  | 0.136626  | 0.42255   | 0.049006  | 0.305529  | -0.012572 |
| NCU01193.2 | 0.358811  | 0.12996   | -0.390844 | 0.067007  | 0.493357  | -0.326713 | -0.573856 | -0.390545 | -0.590156 | -0.814726 |
| NCU01243.2 | -0.250818 |           | 0.850852  |           | 0.336787  | -0.478611 | -0.430615 | 0.063271  | -0.103216 | 0.206908  |
| NCU01258.2 | -0.604766 | -0.2975   | -0.091993 | -0.086466 | 0.490141  | 0.674232  | 0.947568  | 0.923289  | 0.24764   | -0.170779 |
| NCU01345.2 | -0.011916 | 0.184011  | 0.26991   | -0.668615 | 0.474232  | -0.050783 | -0.360706 | -0.182453 | 0.114362  | -0.37683  |
| NCU01419.2 | -0.376752 | -0.527423 | -0.300584 | -0.318693 | 0.560471  | 0.530543  | 0.60572   | 0.196442  | -0.00336  | -0.469861 |
| NCU01422.2 | -0.161875 | 0.009854  | 0.329585  | 0.437243  | 0.185739  | 0.270354  | -0.316511 | -0.400528 | -0.246372 | -0.295534 |
| NCU01427.2 | -1.173586 | 0.759897  | 2.101407  | 2.83734   | 2.210817  | 1.289635  | 0.696666  | 0.130486  | -0.93465  | -0.811717 |
| NCU01510.2 | -0.991187 | -0.058766 | -0.351394 | 0.285825  | -0.032731 | -0.233972 | 0.277076  | 0.804922  | 1.280203  | -0.407646 |
| NCU01539.2 | 0.117288  | 0.070096  | 0.19007   | -1.406493 | 0.575503  | 0.240111  | -0.023297 | 0.480163  | 0.17632   | 0.081589  |
| NCU01555.2 | -0.750707 | -0.039426 | -0.307452 | 0.52361   | 0.076468  | 0.23919   | 0.25101   | 0.471633  | 0.703693  | -0.755352 |
| NCU01636.2 | 0.006845  | 0.474933  | 0.140942  | -0.125769 | 0.039544  | 0.251158  | 0.302678  | 0.70058   | 0.604062  | 0.257255  |
| NCU01763.2 | -0.397086 | -0.256872 | -0.047934 | 0.079123  | 0.148794  | 0.438082  |           | 0.251536  | -0.294292 | -0.313043 |
| NCU01767.2 | -0.111015 | -0.040866 | -0.296189 | 0.381249  | 0.557964  | 0.383662  | -0.334707 | -0.05085  | 0.163621  | -0.166896 |
| NCU01768.2 | -0.379152 | -0.245885 | -0.217211 | -0.321147 | 0.196176  | 0.53717   | 0.252681  | 0.452647  | 0.426684  | 0.001586  |
| NCU01797.2 | -0.205098 | -0.025204 | -0.064216 | -0.288685 | 0.152761  | -0.165253 | -0.39962  | -0.459444 | -0.143008 | -0.256624 |
| NCU01815.2 | -0.869457 | -0.925147 | -0.321842 | 0.356623  | 0.214949  | 0.487195  | 0.085189  | 0.125047  | -0.137412 | -0.493593 |
| NCU01844.2 |           | 0.10692   | 0.538733  | 0.49655   | 0.526247  | -0.07492  |           | -0.088925 | -0.014657 | -0.893078 |
| NCU01847.1 | -0.465131 | -0.614937 | -0.040748 | 0.1289    | 1.205905  | 0.54938   | 0.056732  | 0.247513  | -0.290849 | -0.31312  |
| NCU01861.2 | -2.318392 | -1.476439 | -1.248463 | -0.605292 | 1.68866   | 1.983114  | 2.189849  | 1.643014  | 1.237862  | -0.993402 |

|            |           |           |           |           |           |           |           |           |           |           |
|------------|-----------|-----------|-----------|-----------|-----------|-----------|-----------|-----------|-----------|-----------|
| NCU01881.2 | -0.297476 | -0.188983 | 0.047371  | 0.507877  | 0.694637  | 0.866412  | 0.092502  | 0.596013  | 0.118184  | 0.100611  |
| NCU01895.2 | -0.076045 | 0.060832  | 0.351453  | 0.017434  | 0.48544   | 0.231565  | -0.732046 | -0.142585 | -0.030921 | -0.432469 |
| NCU01904.2 | 0.13603   | -0.34443  | 0.044011  | 0.190519  | -0.377361 | 1.269929  | 0.284451  | 1.147506  | -0.857108 | -0.156172 |
| NCU01905.2 | 0.222941  | -0.649375 | -0.344175 | -0.284149 | -0.492833 | 0.77876   | 0.605668  | 1.243923  | -1.355627 | -0.239603 |
| NCU01906.2 | -0.401    | -0.993835 | -0.250781 | 0.308774  | -0.245342 | 1.18213   | 0.801954  | 1.155122  | -0.103206 | -0.233975 |
| NCU01997.2 | -0.067953 | -0.007934 | 0.910219  | 0.352154  | 1.519405  | 0.537447  |           | -0.14005  | -0.214383 | -0.240626 |
| NCU02124.2 | -0.283313 | -0.213363 | -0.409434 | 0.607657  | 0.062407  | 0.476906  | 0.395812  | 0.518152  | 0.591856  | -0.320034 |
| NCU02190.2 | -3.000609 | 0.635105  | 2.468441  | 3.438731  | 2.002758  | 1.505077  | 1.200153  | 0.701769  | 0.334735  | -0.459977 |
| NCU02191.2 | -0.508694 | 0.332629  | 0.657949  | 0.036691  | -0.056074 | -0.865479 | -0.991426 | -0.245571 | 0.068426  | -0.627911 |
| NCU02203.2 | -0.206902 | -0.197562 | 0.37705   | 0.65197   | 0.238254  | -0.082238 | -0.628243 | -0.58901  | -0.463004 | 0.047836  |
| NCU02255.2 | 0.311198  | 0.914304  | 0.377977  | 1.098916  | 0.824247  | 0.800186  | -0.903821 | 0.613349  | 0.112904  | 0.032573  |
| NCU02264.2 | 0.027328  | 0.452003  | 0.678258  | 1.191351  | 0.576659  | 0.383009  | -0.333414 | -0.028781 | 0.02708   | -0.207895 |
| NCU02265.2 | -0.582705 | 0.948399  | 1.233125  | -0.043316 | 0.816834  | 0.451406  | 0.671602  | 0.940203  | 1.85509   | 0.889513  |
| NCU02287.2 | -0.143094 | 0.240369  | 0.039452  | -1.14128  | 0.162091  | 0.374569  | 0.255587  | 0.452874  | -0.376252 | -0.106037 |
| NCU02322.2 | -1.03504  | -0.651534 | -0.663313 | -0.277803 | 1.212094  | 1.285386  | 0.894795  | 1.225618  | 1.275278  | -0.572424 |
| NCU02356.2 | -0.432716 | 0.363586  | 1.624144  | 0.350303  | 1.235165  | 0.863603  | 0.365665  | 0.100265  | 0.142704  | 0.444578  |
| NCU02375.2 |           | -0.476852 | 0.45683   | -0.804186 | 0.536882  | -0.352005 |           | -0.209375 | -0.178593 | -0.2872   |
| NCU02397.2 | -0.583485 | -0.222041 | -0.195532 | 0.494521  | 0.799441  | 0.597025  | 0.717036  | 0.699934  | 0.547511  | -0.652513 |
| NCU02512.2 |           | -1.438143 |           | -0.564281 | -0.382868 |           | 0.416121  |           | -0.248389 |           |
| NCU02513.2 | -0.067729 | -0.490643 | -0.45199  | 0.056579  | 0.457135  | 0.503061  | 0.052698  | 0.331292  | 0.392455  | -0.234541 |
| NCU02540.2 | -0.331073 | -0.060511 | -0.07095  | 0.655841  | -0.343749 | 0.368133  | -0.127815 | 0.615697  | 0.602122  | -0.493769 |
| NCU02579.2 | -0.508921 | -0.401857 | -0.086461 | 0.15117   | 0.179856  | 0.611443  | 0.59252   | 0.162238  | -0.317286 | -0.570862 |
| NCU02596.2 | -1.159112 | -0.157489 | -0.137253 | 0.553939  | 1.171259  | 1.342979  | 0.892267  | 0.784672  | 1.220696  | -0.642465 |
| NCU02599.2 | -0.026692 | 0.245248  | 0.436077  | -0.519984 | 0.601529  | 0.725687  | 0.091538  | 0.338711  | 0.470046  | 0.082529  |
| NCU02691.2 | -1.357036 | -0.176936 | 0.564084  | 0.203618  | 0.645577  | -0.06884  | -0.325647 | -0.150504 | -0.738643 |           |
| NCU02712.2 | -0.022916 | -0.393005 | -0.26479  | -0.82473  | 0.098806  | 0.664258  | -1.109013 | 0.633202  | 0.382541  | -0.217849 |
| NCU02713.2 | -0.984722 | 1.568495  | 2.134679  | 0.680102  | 0.882096  | 0.969253  | 0.425067  | 0.093222  | -0.260596 | -0.478079 |
| NCU02765.2 | -0.630474 | 0.233228  | 0.023291  | 0.70723   | 0.155494  | 0.411972  | 0.483102  | 0.369922  | 0.609395  | -0.526126 |
| NCU02771.2 | -0.426584 | -0.176239 | 0.199409  | 0.422119  | 0.944237  | 1.233898  | 0.733071  | 1.125262  | 0.397732  | 0.274125  |
| NCU02801.2 | -0.669465 | 0.206623  | 1.149553  | 1.919322  | 1.901733  | 1.682401  | 1.002109  | 1.173384  | 1.198109  | 0.993764  |
| NCU02819.2 | -0.214676 | -0.239542 | 0.859095  | 0.425589  | 0.397939  | 0.231355  | -0.102352 | 0.379852  | -0.041391 | 0.02483   |

|            |           |           |           |           |           |           |           |           |           |           |
|------------|-----------|-----------|-----------|-----------|-----------|-----------|-----------|-----------|-----------|-----------|
| NCU02887.2 | -0.419235 | -0.323261 | -0.222735 | -1.324086 | 0.886956  | 0.518014  | 0.916903  | 1.032731  | -0.267919 | -0.61539  |
| NCU02888.2 | -0.279513 | 0.229672  | 0.274246  | -1.610668 | 1.160245  | 0.960371  | 0.631167  | 0.779279  | -0.256956 | -0.544378 |
| NCU02906.2 |           | -0.143007 | -0.423825 | 0.400353  | 0.391616  | 0.612883  | 0.794418  | 0.304413  | 0.383987  | -0.679174 |
| NCU02945.2 | -0.033782 | 0.289961  | 0.391227  | 0.647465  | 0.300525  | -0.22203  | -0.17151  | 0.103777  | 0.0324    | -0.303288 |
| NCU02948.2 | -0.965039 | -0.23464  | -0.041823 | 0.490233  | 0.608153  | 0.610597  | 0.358041  | 0.251676  | -0.084015 | -0.521076 |
| NCU03071.2 | -0.688543 | 0.053991  | 0.713726  | -0.712873 | 0.879459  | 0.122617  | 0.129168  | 0.005704  | -0.014408 | -0.179605 |
| NCU03072.2 | -0.216362 | 0.127093  | 1.012938  | 1.177055  | 0.761771  | 0.014318  | 0.124731  | 0.326006  | -0.138609 | -0.344168 |
| NCU03151.2 | -0.260075 | 0.107729  | 0.24266   | 0.643386  | -0.001014 | 0.941596  | 0.797136  | 1.016185  | 0.505947  | 0.166635  |
| NCU03188.2 | -0.506354 | -0.109994 | 0.411297  | 0.331153  | 1.2309    | 1.253819  | 0.170906  | 0.528526  | -0.600592 | -0.340603 |
| NCU03214.2 | -0.24268  | -0.321302 | -0.308953 | 0.0844    | 0.755764  | 0.356149  | -0.247188 | 0.173226  | -0.305234 | -0.259456 |
| NCU03263.2 | -0.158268 | -0.221244 | -0.394212 | -0.096738 | 0.309227  | -0.208208 | -0.362406 | -0.017367 | -0.345292 | -0.501725 |
| NCU03290.2 | -0.12302  | 0.134114  | -0.285995 | -0.515189 | 0.485269  | 0.806849  | 0.115378  | 0.406853  | -0.345651 | -0.038341 |
| NCU03312.2 | 0.284606  | 0.231703  | 0.119957  | 0.49363   | 0.0667    | 0.270269  | -0.087067 | 0.185141  | 0.880497  | 0.16999   |
| NCU03341.2 | 0.193244  | -0.005372 | -0.016853 | 0.439118  | 0.26499   | -0.271842 | -0.631879 | -0.331523 | 0.054584  | -1.524163 |
| NCU03357.2 | 0.020343  | -0.555355 | 0.125179  | 0.393095  | 0.885989  | 0.377405  | 0.034302  | -0.179611 | -0.240173 | -0.250484 |
| NCU03358.2 | -0.576072 | -0.379446 | -0.290851 | -0.70922  | 0.496979  | 0.967915  | 0.696597  | 1.01108   | -0.093287 | -0.286503 |
| NCU03378.2 | 0.029411  | -0.094493 | -0.641249 | 0.458984  | 0.601264  | 0.793778  | 0.380128  | 0.47016   | 0.251004  | 0.091806  |
| NCU03415.2 | -0.584006 | -0.867792 | -1.123881 | -1.381674 | 0.515981  | 0.388461  | 0.444637  | 1.224035  | -1.91022  | -1.074187 |
| NCU03460.2 | -0.251194 | -0.208112 | -0.269288 | 0.599968  | 0.47265   | 0.014754  | -0.168877 | 0.216246  | 0.346284  | -0.356723 |
| NCU03530.2 | 0.320232  | -0.059351 | -0.234548 | -0.767296 | 0.151017  | 0.085914  | 0.128842  | 0.155293  | 0.062712  | -0.610592 |
| NCU03602.2 | 0.034268  | 0.297816  | 0.126737  | 1.139679  | 0.304287  | 0.252191  | -0.76831  | -0.176999 | 0.215043  | -0.388461 |
| NCU03617.2 | -0.516379 | -0.715838 | -0.805003 | 0.050884  | -0.363681 | 0.384657  | -0.36983  | 0.105101  | -0.328757 | -0.397896 |
| NCU03643.2 | -0.591765 |           | 0.124051  | 1.255915  | 0.11023   | 0.970713  | 1.353383  | 0.71807   | -0.893711 | -0.969379 |
| NCU03685.2 | -1.602731 | -0.582632 | -0.226699 | -0.282213 | 0.238056  | 0.1353    | 0.148811  | 0.025193  | 0.068307  | -0.321888 |
| NCU03699.2 | 0.306096  | 0.391614  | 0.138065  | -1.239633 | 0.686283  | -0.325654 | -0.544312 | -0.184768 | -0.518704 | -0.15494  |
| NCU03731.2 | -0.474664 | -0.134834 | -0.005286 | 0.631354  | 0.534224  | 0.892363  | 0.463153  | 0.699941  | 0.228659  | -0.480166 |
| NCU03779.2 | -0.551553 | -0.996502 | -0.726199 | 0.014928  | 0.187813  | 0.551595  | 0.165422  | 0.064934  | -0.520913 | -0.794317 |
| NCU03780.2 | -0.788256 | -0.102404 | 0.1504    | 0.768008  | 0.545068  | 0.598774  |           | 0.705534  | 0.840081  | -0.540848 |
| NCU03803.2 | 0.019031  | 0.050662  | -0.093101 | 0.382615  | -0.574319 | 0.628407  | 0.239333  | 0.817875  | -0.477479 | -0.277518 |
| NCU03967.2 | -3.433554 | -0.29492  | 1.793058  | 2.134255  | 2.130808  | 2.203639  | 1.859802  | 2.00361   | 1.999066  | 2.093913  |
| NCU03968.2 | -0.347768 | -0.198215 | 0.286398  | 0.67834   | 0.870229  | 0.560284  | 0.261802  | 0.679756  | 0.413327  | 0.111507  |

|            |           |           |           |           |           |           |           |           |           |           |
|------------|-----------|-----------|-----------|-----------|-----------|-----------|-----------|-----------|-----------|-----------|
| NCU04071.2 | -0.200291 | -0.368947 | -0.502275 | -0.025958 | 0.239287  | 0.121927  | -0.257255 | 0.138006  | 0.026132  | -0.628013 |
| NCU04091.2 | -0.374335 | 0.318652  | 0.424518  | 1.030297  | 0.699277  | 0.128431  | -0.321631 | -0.540566 | -0.110329 | -0.142558 |
| NCU04174.2 | -0.401558 | -0.126519 | -0.242131 | 0.347407  | 0.149869  | 0.033589  | -0.330087 | 0.112131  | -0.069735 | -0.480305 |
| NCU04179.2 | -0.962863 | -0.339071 | 0.062439  | 0.06579   | 1.785688  | 0.95255   | 0.615543  | 0.964884  | 0.374372  | 0.178268  |
| NCU04265.2 | 0.119213  | -0.246169 | -0.313572 | 0.229416  | -0.550619 | 0.819333  | 0.411699  | 0.919653  | -0.491545 | -0.389287 |
| NCU04266.2 | -0.464643 | 0.053034  | -0.417533 | 0.089294  | 0.696014  | 0.843739  | 0.193606  | 0.305096  | 0.891921  | -0.594204 |
| NCU04274.2 | -0.103307 | 0.360688  | 0.455983  | 0.516523  | 0.576816  | -0.205031 | -0.35724  | -0.26893  | -1.228006 | 0.285575  |
| NCU04295.2 | -0.77438  | -0.593009 | 0.473543  | 1.219487  | 1.139893  | 1.126225  | 1.499411  | 0.311083  | -0.280815 | -0.744767 |
| NCU04342.2 | 0.197588  | -0.343201 | -0.157034 | 0.72037   | 0.387056  | 0.936981  | -0.041009 | 0.576537  | -0.439038 | -0.008079 |
| NCU04343.2 | -0.485018 | -0.35476  | -0.18782  | 0.530265  | 0.091269  | 0.80767   | 0.439921  | 0.802996  | -0.246499 | -0.24543  |
| NCU04371.2 | -0.593642 | 0.010747  | 0.839435  | 1.211296  | 1.452173  | 1.145665  | 1.494184  | 1.62912   | 0.516461  | 0.422878  |
| NCU04387.2 | 0.010866  | 0.077371  | 0.065663  | 0.081823  | 0.564144  | 0.151902  | -0.160816 | 0.190553  | 0.023898  | -0.255853 |
| NCU04415.2 | -0.571437 | -0.809629 | -0.440845 | -0.132192 | -0.108535 | 0.634365  | 0.242622  | 0.604604  | 0.885243  | -0.460234 |
| NCU04417.2 | -0.232868 | -0.589353 | -0.475277 | 0.345636  | -0.101122 | 0.914245  | 0.01912   | 0.997481  | 1.155832  | -0.218038 |
| NCU04452.2 | -1.64452  | 0.626434  | 1.303562  | 2.488545  | 1.710389  | 1.998695  | 1.394074  | 1.377712  | 0.705961  | 0.082278  |
| NCU04460.2 | -0.216517 | -0.910521 | -0.393477 | 0.224428  | 0.512597  | 0.444016  | 0.612639  | 0.531647  | -0.074347 | -0.113289 |
| NCU04474.2 | -0.682476 | -0.125893 | -0.134142 | 0.201894  | -0.099115 | 0.180432  |           | 0.138117  | 0.0586    | -0.298402 |
| NCU04510.2 | -0.549948 | -0.359205 | -0.478078 | 0.068327  | -0.116506 | 0.660461  | 0.212373  | 0.384383  | 0.371585  | -0.54945  |
| NCU04533.2 | 0.112734  | -0.672575 | -1.019964 | 0.085006  | 1.381305  | -1.20542  | 2.109139  | 2.318472  | 0.017631  | 1.271664  |
| NCU04605.2 | -0.889908 | 0.093791  | 0.010247  | -0.005889 | -0.712646 | 0.19602   | 0.220209  | 0.541176  | 1.09308   | -0.553278 |
| NCU04635.2 | -0.693658 | 0.188728  | 0.059334  | -0.020656 | -0.872773 | -0.164177 | -0.259195 | 0.379978  | 0.278979  | -0.722106 |
| NCU04637.2 | -0.360834 | 0.49022   | 0.190724  | 0.464853  | 0.328326  | -0.148077 | -0.774625 | -0.379745 | -0.376781 | -0.0668   |
| NCU04667.2 | -0.073126 | 0.128207  | -0.09896  | -0.966379 | -0.56072  | 0.271838  | -0.055557 | 1.484322  | 2.606675  | 0.86104   |
| NCU04674.2 | -0.016948 | -0.674051 | -0.886315 | -0.68503  | -0.770315 | 0.389402  | 0.384707  | 1.808886  | -0.627852 | -0.22979  |
| NCU04675.2 | 0.105446  | -0.362568 | -0.58862  | -0.392436 | -0.519584 | 0.738592  | -0.226659 | 0.644667  | 0.271287  | 0.0819    |
| NCU04676.2 | 0.139077  | -0.092235 | 0.019513  | 0.150652  | 0.381658  | 0.724506  | 0.036353  | 0.642292  | 0.259864  | -0.056192 |
| NCU04757.2 | -0.536336 | -0.540887 | -0.127957 | 0.546486  | 0.781993  | 0.790372  | -0.132977 | -0.294649 | -0.154114 | -0.219184 |
| NCU04796.2 | -0.287955 | 0.069314  | 0.358276  | -0.621009 | 0.403307  | 0.588954  | 0.267158  | 0.398654  | -0.350408 | -0.305391 |
| NCU04797.2 | -0.113321 | 0.590731  | -0.233307 | -0.801214 | 0.301625  | 0.448858  | 0.495239  | 0.663794  | -0.270923 | -0.253626 |
| NCU04801.2 | -0.29975  | -0.271244 | -0.071622 | -0.055463 | 0.649721  | 0.895539  | -0.432455 | 0.308052  | -0.113786 | -0.332706 |
| NCU04814.2 | -0.191881 | 0.252145  | -9.92E-04 | 0.55925   | 0.490213  | 0.241343  | -0.3771   | -0.302673 | 0.00191   | -0.171546 |



|            |           |           |           |           |           |           |           |           |           |           |
|------------|-----------|-----------|-----------|-----------|-----------|-----------|-----------|-----------|-----------|-----------|
| NCU04823.2 | -1.141515 | -0.775172 | -0.796623 | -0.811061 | 0.755911  | 0.871898  | 1.111354  | 1.466336  | 1.422806  | -0.796485 |
| NCU04908.2 | -1.004414 | -0.602677 | -1.08501  | -0.889014 | 0.90239   | 1.417713  | 1.30291   | 0.718467  | 0.526933  | -0.727721 |
| NCU04921.2 | -0.440156 | -0.618081 | 0.258842  | 0.607324  | 0.754705  | 0.159247  | 0.095874  | 0.271338  | 0.247661  | -0.184447 |
| NCU04946.2 | -0.251847 | 0.049336  | -0.245592 | -0.375141 | 0.344702  | 0.650351  | 0.197416  | 0.669241  | 0.47473   | -0.021153 |
| NCU04963.2 | 0.21872   | -0.564977 | -0.355061 | -0.62704  | -1.323157 | 0.382676  | 0.470346  | 1.283886  | -1.612503 | -0.456062 |
| NCU05007.2 | 0.11979   | -0.18598  | 0.51276   | -0.378994 | 1.09978   | -0.054332 | -0.280322 | 0.09843   | -0.612894 | -0.327532 |
| NCU05061.2 | -0.156944 | -0.934795 | -0.930499 | -0.799612 | -0.25027  | 0.115066  | -0.039869 | 0.146691  | -0.594403 | -0.375288 |
| NCU05133.2 | 0.056944  | -0.214142 | 0.188624  | -0.411438 | 0.044349  | -0.135584 | -0.091631 | -0.489316 | -0.012222 | -0.133477 |
| NCU05148.2 | -0.805432 | -0.645871 | -0.399781 | 0.449991  | 0.278211  | 0.818454  | 1.429359  | 0.871513  | 0.571178  | -1.276687 |
| NCU05169.2 |           | -0.878868 | -0.129963 |           | 0.481864  | 0.372037  | 0.661355  |           |           |           |
| NCU05291.2 | -0.223294 | -0.310484 | -0.154649 | 0.350645  | 0.44619   | 0.613946  | 0.520148  | 0.484289  | 0.24083   | -0.236933 |
| NCU05429.2 | 0.135061  | -0.11485  | -0.279419 | -0.116105 | 0.506763  | 0.615634  | 0.271959  | 0.275593  | 0.156006  | 0.11735   |
| NCU05490.2 | -0.704323 | 0.237623  | 0.012025  | 0.890502  | -0.143221 | 0.52594   | 0.237374  | 0.08728   | 0.556123  | -0.66156  |
| NCU05594.2 | -1.00774  | 0.578335  | 1.874784  | 2.998992  | 1.417877  | 1.798373  | 0.4786    | -0.062244 | -0.918403 | -1.000346 |
| NCU05627.2 | 0.088546  | -0.388229 | -0.476011 | -1.070596 | 0.303096  | 1.693961  | 0.8844    | 2.077692  | -1.345622 | -0.123504 |
| NCU05639.2 | -0.297392 | -0.596473 | -0.898848 | -0.037862 | 0.378267  | 0.587515  |           | 0.102641  | -0.139892 | 0.690784  |
| NCU05652.2 | -0.433079 | -0.442611 | -0.150377 | 0.616428  | 0.137477  | 1.349248  | 2.063867  | 1.19396   | 2.042257  | -0.326948 |
| NCU05683.2 | -0.589003 | -0.500941 | 0.114747  | 0.3118    | 0.87637   | 0.575265  | 0.022921  | -0.409847 | -0.6194   | -0.179328 |
| NCU05721.2 | -0.487064 | 0.167692  | 1.394422  | 1.714495  | 0.586475  | 0.555702  | 0.162488  | 0.345613  | 0.081595  | -0.25315  |
| NCU05770.2 | -0.882896 | -0.734024 | 0.370784  | 1.326435  | 1.064193  | 1.629056  | 1.032446  | 0.894214  | 0.418418  | 0.147792  |
| NCU05785.2 | -0.060819 | 0.120397  | -0.063591 | -0.21109  | -0.003064 | -0.208934 | -0.261295 | -0.04676  | -0.12883  | -0.18914  |
| NCU05786.2 | -0.353963 | 0.109064  | 0.221951  | -0.589745 | 0.181587  | -0.325206 | -0.786346 | -0.247564 | -0.497783 | -0.369891 |
| NCU05844.2 | 0.271293  | 0.384009  | 0.424892  | 0.359346  | 0.955306  | 0.736398  | 1.03313   | 0.744514  | 0.933774  | 0.23356   |
| NCU05850.2 | -0.458799 | -0.663356 | -0.326263 | -1.192821 | 0.457388  | 0.808604  | -0.024987 | 0.629811  | 0.090036  | -0.507314 |
| NCU05858.2 | 1.289092  | -0.070074 | -0.637314 | -0.818373 | 2.206201  | -0.226168 | 0.670959  | 0.27683   | -2.179052 | 1.202203  |
| NCU05882.2 | -0.337178 | -0.483399 | -0.493215 | 0.26001   | -0.903882 | 0.802997  | -0.088851 | 0.414381  | 0.447041  | 0.154627  |
| NCU05897.2 | 0.162627  | -1.116783 | -1.246731 | 0.379855  | -1.171898 | 0.418331  | 0.530057  | 1.775555  | -1.612605 | -0.56414  |
| NCU06005.2 | 0.051667  | -0.281741 | -0.367569 | -0.606613 | 1.095041  | 0.639915  | -0.3554   | -0.212251 | -0.56031  | -0.382434 |
| NCU06009.2 | -0.116452 | -1.156494 | -0.389397 | -0.010658 | -0.150902 | 0.619363  | -0.416818 | 0.376511  | 0.21316   | -0.111656 |
| NCU06020.2 | -0.23409  | -0.071634 | 0.157311  | 0.584598  | 0.236734  | -0.018928 | -0.002953 | 0.169723  | 0.104948  | -0.045457 |
| NCU06095.2 | -0.539862 | 0.248895  | 0.822382  | 0.504522  | 0.949952  | 0.148986  | -0.343062 | -0.236702 | -0.448422 | -0.471638 |

|            |           |           |           |           |           |           |           |           |           |           |
|------------|-----------|-----------|-----------|-----------|-----------|-----------|-----------|-----------|-----------|-----------|
| NCU06131.2 | 0.156688  | -0.101592 | -0.146689 | -0.211048 | -0.081468 | 0.289719  |           | 0.496249  | 1.000021  | -0.095909 |
| NCU06203.2 | -0.290829 | 0.616221  | 0.377731  | 0.571272  | 0.193155  | 0.09443   | -0.233207 | -0.351399 | -0.729013 | -0.082203 |
| NCU06218.2 | -0.013832 | -0.231401 | -0.413309 | 0.130663  | 0.102777  | -0.446901 | -0.438605 | 0.0663    | 0.043235  | 0.094287  |
| NCU06265.2 | -0.586095 | -0.525421 | -0.57237  | 0.188464  | -0.149207 | 0.253064  | 0.255005  | 0.692023  | 1.40426   | 0.172182  |
| NCU06306.2 | -0.931577 | -0.653596 | 0.756019  | 1.483804  | 1.516452  | 0.437576  | -0.120436 | -0.36755  | -0.14976  | -0.377276 |
| NCU06416.2 | -0.192528 | -0.570883 | -0.424141 | 0.973236  | 0.70072   | 0.439775  | 0.475598  | 0.081137  | -0.56154  | -0.228066 |
| NCU06420.2 | -0.751525 | 0.538556  | 1.446848  | 2.093296  | 1.492925  | 1.702194  | 0.680658  | 0.449716  | 0.729202  | 0.487845  |
| NCU06506.2 | -0.172883 | -0.120911 | -0.453551 | -1.266818 | -1.110587 | 0.105901  | 0.308206  | 0.521718  | 0.97572   | -0.094399 |
| NCU06549.2 | -0.094014 | 0.121497  | 0.178097  | 0.478621  | 0.971049  | 0.464571  | -0.595739 | -0.309634 | -0.305544 | 0.085536  |
| NCU06554.2 | -0.492513 | -0.060391 | 0.43609   | 0.017886  | 1.340636  | 1.422151  | 0.638534  | 0.330567  | 0.250882  | 0.11038   |
| NCU06597.2 | -1.513299 | -0.301842 | -0.107769 | 0.665962  | 1.863645  | 2.031277  | 1.907244  | 1.369994  | 1.138439  | -0.506008 |
| NCU06603.2 | -0.312101 | -0.612754 | -0.293246 | -1.33068  | 0.646113  | 0.505024  | 0.40666   | 0.52663   | -0.208364 | -0.182659 |
| NCU06662.2 | -0.13336  | 0.963793  | 2.346772  | 2.498458  | 1.51721   | -0.045857 | -0.519171 | 0.563823  | -1.0261   | -0.730116 |
| NCU06682.2 | -0.335986 | -0.196138 | -0.198977 | 0.294287  | -0.617281 | 0.207171  | 0.228515  | 0.173509  | 0.373536  | -0.696839 |
| NCU06751.2 | -0.869969 | -0.421195 | 0.277264  | 0.982623  | 1.552437  | 1.427504  | 0.602511  | 0.114757  | -0.195275 | -0.448563 |
| NCU06915.2 | -1.813899 | 0.298063  | 1.392917  | 1.935961  | 1.398184  | 1.099606  | 0.627087  | 0.718847  | 0.15147   | 0.042062  |
| NCU06977.2 | -0.633715 | -0.947007 | -1.620191 | -0.722493 | -0.296512 | 0.248788  | 0.320368  | 0.710227  | 0.238225  | -0.185012 |
| NCU06986.2 | 0.122054  | -0.136683 | -0.059243 | 0.065115  | 0.438695  | -0.153147 | -0.021428 | -0.099925 | -0.326455 | -0.753444 |
| NCU07024.2 | -0.338153 | 0.322701  | 0.569586  | 0.256201  | 0.738151  | 0.4175    | 0.182753  | 0.431622  | 0.263881  | -0.562942 |
| NCU07061.2 | -0.312534 | 0.063152  | -0.026361 | -0.294782 | 0.188658  | 0.341746  | 0.569903  | 0.440457  | 0.491281  | 0.157161  |
| NCU07064.2 | -0.821829 | -0.512527 | -0.404764 | -0.128496 | -0.570436 | 1.468074  | 1.003033  | 1.350073  | 0.103744  | -0.090515 |
| NCU07075.2 | -0.187225 | 0.226455  | 0.905163  | 1.020563  | 1.392731  | -0.044041 | 0.860189  | 0.221259  | -0.088657 | -0.791861 |
| NCU07082.2 | -0.732509 | 0.38319   | 0.494087  | 0.473166  | 0.481741  | 0.645214  | 0.028923  | 0.623135  | 1.035673  | -0.16311  |
| NCU07119.2 |           | -0.160739 | 0.025937  | 0.462749  | 0.988937  | 0.683304  | 0.366194  |           | 8.46E-04  | -0.260136 |
| NCU07120.2 | -0.468832 | -0.208138 | -0.272884 | 0.857795  | 0.532234  | 0.62431   | 0.470244  | 0.282416  | -0.039679 | -0.826123 |
| NCU07142.2 | -0.663017 | -0.122053 | -0.492644 | 0.51053   | -0.423144 | 0.363283  | -0.37173  | 0.178284  | 0.599758  | -0.543885 |
| NCU07159.2 | -0.227406 | -0.173055 | 0.056866  | -0.765269 | 1.822844  | 1.391632  | 1.099583  | 0.864835  | -0.668888 | 0.78411   |
| NCU07221.2 | -0.794877 | 0.248055  | 0.601206  | -0.186329 | -0.47701  | 0.151733  | -0.207543 | -0.854036 | -0.209355 | -0.341593 |
| NCU07232.2 | -2.102242 | -1.231761 | -1.540036 | -0.71413  | -1.287745 | 0.496575  | 1.829602  | 0.804975  | 1.0972    | -0.614936 |
| NCU07264.2 | -0.315878 | -0.125668 | 0.541912  | 1.675238  | 2.04785   | 0.955738  | 0.050566  | -0.077466 | -0.664857 | -0.660584 |
| NCU07267.2 | -1.572663 | -0.342669 | 0.606399  | 1.838522  | 2.06045   | 3.036873  | 2.946626  | 2.649279  | 2.304111  | 0.966979  |

|            |           |           |           |           |           |           |           |           |           |           |
|------------|-----------|-----------|-----------|-----------|-----------|-----------|-----------|-----------|-----------|-----------|
| NCU07273.2 | -0.135819 | -0.6636   | -0.265825 | 0.510913  | -0.074927 | 0.53255   | 0.090849  | 0.520395  | 0.694579  | -0.278927 |
| NCU07287.2 | -0.329242 | -0.606828 | -0.326498 | -0.729959 | -0.005288 | -0.173547 | -0.200096 | -0.260116 | -0.250041 | -1.522243 |
| NCU07296.2 | -0.098347 | 0.042905  | 0.325431  | 0.338055  | 1.084165  | 0.629808  | 0.152292  | 0.12193   | 0.101224  | -0.059081 |
| NCU07325.2 | -3.230345 | -1.632737 | 0.5285    | 2.473047  | 3.116206  | 2.470008  | 2.184392  | 1.28295   | -0.079906 | -2.590308 |
| NCU07332.2 | -0.501364 | 0.109343  | 0.050544  | 0.397943  | 0.634192  | 0.833104  | 0.45831   | 0.093401  | 0.376971  | -0.450081 |
| NCU07338.2 | 0.145738  | -0.112848 | 0.097299  | 0.641264  | -0.042036 | 0.496037  | -0.560693 | 0.405727  | 0.588221  | 0.03964   |
| NCU07363.2 | -0.34362  | 0.159429  | 0.457328  | 1.3229    | 0.27982   | 0.569224  | -0.139503 | 0.107385  | 0.095945  | 0.170118  |
| NCU07400.2 | 0.003011  | -0.982628 | 0.111597  | 0.194483  | 0.738308  | -0.098063 | 0.577773  | 0.277385  | 0.295734  | 0.148766  |
| NCU07401.1 | 0.005239  | -0.064345 | 0.246862  | 0.581767  | 0.744666  | 0.752131  | -0.130508 | 0.413277  | 0.379602  | -0.316055 |
| NCU07424.2 |           | -0.233571 | -0.038986 | -0.085469 | 0.580343  | 0.199954  | 0.311359  | -0.457852 | 0.489885  | -0.473517 |
| NCU07434.2 | -0.758496 | -0.293434 | 1.07222   | -0.742487 | 2.267709  | 0.831961  | 0.760666  | 0.514921  | 0.369421  | -0.018925 |
| NCU07441.2 |           | 0.295183  | 0.207938  | -0.694208 | -1.764868 | -0.392584 | -0.498917 | -0.175088 | 1.627913  | 0.510056  |
| NCU07453.2 | -0.239631 | -0.675    | -0.753566 | 0.014699  | 0.714238  | 0.945303  | 0.332118  | 0.599251  | -0.331996 | 0.091318  |
| NCU07541.2 | -0.889248 | -0.571486 | 0.554719  | 1.217895  | 1.503617  | 1.447875  | 0.203937  | 0.348666  | 0.466799  | -0.424095 |
| NCU07584.2 | -0.169736 | 0.636755  | 0.941476  | 0.89328   | 0.420906  | 0.006649  | 0.202659  | -0.046381 | 0.075741  | 0.181202  |
| NCU07585.2 | -0.887621 | 0.672406  | 1.281267  | 1.372809  | 2.10164   | 2.120476  | 1.183494  | 1.254552  | 0.840103  | 1.159825  |
| NCU07649.2 | -0.290796 | -0.348213 | -0.038559 | 0.258737  | 0.640245  | 0.933098  | 0.258631  | 0.240475  | 0.080162  | 0.047432  |
| NCU07661.2 |           |           | -0.071129 | -0.695245 | 1.722775  |           | 0.933949  | 0.168634  | 0.418399  |           |
| NCU07675.2 | 0.034424  | 0.42237   | 0.622155  | 0.778337  | -0.159872 | -0.060248 | -0.449932 | -0.463442 | 0.112804  | 0.359347  |
| NCU07723.2 | -0.103564 | 0.045416  | -0.118108 | -1.069639 | 0.53985   | 0.478222  | 0.703385  | 0.543032  | -0.01021  | -0.434792 |
| NCU07745.2 | -0.298732 | -0.371868 | -0.274406 | 0.193127  | 0.449216  | 0.228001  | 0.223191  | 0.13284   | -0.316951 | 0.108159  |
| NCU07921.2 | -0.762265 | -0.018511 | -0.022595 | -0.219975 | -1.286268 | -0.481048 | -0.429491 | 0.062065  | 0.057011  | -0.509144 |
| NCU07962.2 | -0.573808 | 0.081641  | 0.383698  | 0.630874  | 0.214893  | 0.620503  | 0.24509   | 0.147877  | 0.23433   | -0.129413 |
| NCU07971.2 | -0.360645 | 0.211997  | 1.132559  | -0.069472 | 0.630186  | -0.166696 | -0.766196 | -0.036263 | 0.013434  | -0.33012  |
| NCU08057.2 |           | -0.05609  | 0.897552  | 0.76017   | -0.53928  | 0.3888    | 0.101913  | 0.140823  | 0.854226  | -0.234173 |
| NCU08064.2 | -0.453749 | 0.583944  | 0.670286  | 0.211976  | -0.192302 | -0.099841 | 0.345469  | 0.046509  | 0.593233  | -0.493545 |
| NCU08070.2 | -0.250188 | -0.714705 | 0.288089  | 0.117741  | 0.98867   | 0.592522  | 0.766746  | 0.686294  | 0.265108  | -0.278816 |
| NCU08095.2 | -2.05501  | -0.441393 | -2.063079 | 0.775494  | 0.353967  | 0.502822  | 0.888218  | -0.196063 | -0.622177 | -0.818534 |
| NCU08127.2 | 0.036593  | 0.182089  | 0.159688  | 0.518442  | 0.458743  | 0.644519  | 0.368143  | 0.372005  | 0.336273  | 0.029603  |
| NCU08133.2 | -0.190961 | 0.273578  | 0.030806  | -0.082391 | 0.808196  | 0.494013  | 0.338584  | 0.576116  | -0.158722 | -0.689666 |
| NCU08190.2 | -0.132076 | -0.821139 | -0.269589 | 0.440908  | 0.438041  | 0.969883  |           | 0.44663   | -0.617604 | -0.498042 |

|            |           |           |           |           |           |           |           |           |           |           |
|------------|-----------|-----------|-----------|-----------|-----------|-----------|-----------|-----------|-----------|-----------|
| NCU08224.2 | -0.487464 | -0.593411 | -0.677174 | -1.587632 | -0.564011 | 0.41887   | -0.269486 | 0.234896  | -0.331733 | -0.176026 |
| NCU08280.2 | -0.433916 | 0.097827  | 0.276732  | 0.647572  | -0.209563 | -0.175375 | -0.3252   | -0.475874 | -0.007324 | -0.526064 |
| NCU08290.2 | -0.268273 | -0.090448 | 0.049781  | 0.192647  | 0.515575  | 0.613511  | -0.218624 | 0.293578  | -0.217188 | -1.957418 |
| NCU08291.2 | -1.027232 | 0.132524  | 0.991411  | 1.64178   | 1.56265   | 1.920688  | 1.30837   | 1.317436  | 0.746528  | 0.416961  |
| NCU08418.2 | 0.14234   | -0.166523 | -0.539342 | 0.117125  | -0.120411 | 0.19635   | 0.312752  | -0.098883 | 0.075451  | 0.68608   |
| NCU08440.2 | 0.099183  | -0.335773 | -0.360427 |           | 0.880004  | 0.668834  |           | 0.683023  | 0.172614  | 0.380649  |
| NCU08455.2 | -0.624418 | -0.25752  | -1.099461 | -0.060473 | 2.516354  | 0.041773  | 1.158118  | 1.091336  | -0.794175 | -0.141458 |
| NCU08457.2 | -0.623398 | -2.056217 | -2.128436 | -1.905629 | 4.304808  | -1.282862 | 2.611896  | 2.726944  | 0.429045  | 2.496111  |
| NCU08501.2 | 0.107457  | -0.33188  | -0.058119 | -1.423878 | 0.100745  | 0.211582  | -0.295954 | 0.132924  | -0.01275  | -0.036099 |
| NCU08549.2 | -1.539717 | -0.921632 | -0.870253 | -0.131888 | 0.677105  | 0.777744  | 0.595073  | 0.262826  | 0.02424   | -1.169874 |
| NCU08626.2 | -1.922434 | 1.300133  | 2.681988  | 1.960453  | 3.09064   | 1.59371   | 0.889366  | 0.233289  | -0.379386 | -0.757931 |
| NCU08674.2 | -0.319285 | 0.383118  | 1.056096  | 0.040938  | 1.356793  | 0.157185  | -0.696744 | -0.559465 | -0.818026 | -0.392077 |
| NCU08677.2 | -0.319119 | 0.108507  | -0.116063 | 0.438871  | 0.512997  | 0.444864  | 0.01651   | 0.256991  | -0.027861 | -0.331546 |
| NCU08699.2 | -2.241424 | -1.153586 | 1.356994  | 2.282092  | 2.935771  | 2.390691  | 2.043021  | 0.944704  | 0.890757  | -0.638057 |
| NCU08769.2 | -2.730135 | -1.061653 | 1.041644  | 3.184353  | 3.331516  | 3.730746  | 4.370375  | 3.014158  | 1.240696  | -1.702723 |
| NCU08791.2 | -0.249835 |           | -0.051565 | -2.016326 | 1.21833   | 1.259326  | 1.042916  | 1.162614  | 1.26539   | 0.21961   |
| NCU08824.2 | -1.238332 | 0.397792  | 1.394313  | 2.754715  | 2.053069  | 1.997349  | 1.151052  | 0.844114  | -0.345582 | -0.267856 |
| NCU08850.2 |           |           |           | 0.915318  | 2.049172  | 1.281842  | 1.171817  | 0.642482  | 0.741443  | -0.629462 |
| NCU08922.2 | -1.356174 | -0.637381 | -0.562403 | -0.817894 | 0.752232  | 0.199278  | -0.151752 | 0.068642  | -0.810419 | -0.035487 |
| NCU08949.2 | -0.384215 | -0.43872  | -0.405518 | 0.369646  | 0.467412  | 0.575757  | 0.826328  | 0.906684  | 1.109316  | -0.219437 |
| NCU09041.2 | -0.085028 | 0.021933  | -0.078184 | 0.404163  | -0.311904 | 0.723203  | 0.637548  | 0.666218  | 0.954428  | 0.143269  |
| NCU09043.2 | -0.977502 | -0.3104   | -0.375829 | 0.291608  | 1.016554  | 0.779082  | 0.750803  | 0.47499   | 0.195443  | -0.356548 |
| NCU09051.2 | -1.780881 | 0.584147  | 0.324686  | 0.633724  | 1.721039  | 1.964556  | 2.03858   | 2.381826  | 1.777712  | 0.037759  |
| NCU09057.2 | 0.175619  | -0.242512 | -0.055465 | -0.417591 | 0.370954  | 0.722848  | 0.287134  | 0.483819  | 0.61433   | 0.026837  |
| NCU09079.2 | -0.341766 | 0.062507  | 0.470105  | 1.250788  | 0.869928  | 0.09049   | 0.160853  | -0.121938 | 0.348538  | -0.508046 |
| NCU09115.2 | -0.583229 | -0.881055 | -0.639325 | 0.613362  | 0.895451  | 0.908205  | 0.459404  | 0.311191  | -0.474888 | -0.718629 |
| NCU09141.2 | -0.815438 | -0.197795 | 0.660732  | 2.019322  | 2.369332  | 2.246327  | 1.636344  | 1.127245  | 0.421816  | 0.311404  |
| NCU09201.2 | -0.100434 | 0.038623  | 0.159426  | -0.158655 | 0.850294  | -0.174159 | 0.167509  | -0.03632  | 0.370672  | -0.144889 |
| NCU09209.2 | 0.274297  | -0.943699 | -0.482236 | -0.290201 | 2.735531  | 0.084688  | 2.056556  | 1.757981  | -0.375292 | -0.095393 |
| NCU09210.2 | 0.166257  | -0.174281 | 0.003518  | 0.987325  | 1.815446  | 0.984961  | 2.13208   | 2.009148  | -0.536239 | 0.008395  |
| NCU09266.2 | 0.076558  | -0.01278  | -0.526771 | -0.399321 | 0.153719  | 0.331764  | -0.087683 | 0.225128  | -0.399854 | -0.099936 |

|            |           |           |           |           |           |           |           |           |           |           |
|------------|-----------|-----------|-----------|-----------|-----------|-----------|-----------|-----------|-----------|-----------|
| NCU09290.2 | 0.131044  | -0.255042 | -0.094719 | 0.463207  | 0.537893  | 0.384739  | 0.180304  | 0.324141  | 0.182783  | -0.196032 |
| NCU09306.2 | -1.797558 | 1.049168  | 2.240932  | 3.240756  | 2.629556  | 1.681689  | 1.197945  | 0.715648  | -0.193291 | -0.196695 |
| NCU09403.2 | -0.075955 | -1.102078 | -0.300106 | 0.579968  | -0.023159 | 6.81E-04  | 0.367326  | -0.059705 | 0.255465  | -0.094858 |
| NCU09502.2 |           | 1.15811   | 1.316334  |           | 0.365327  | 0.169371  | -0.861821 | -0.142833 | 0.628403  | 0.034743  |
| NCU09526.2 | -0.829176 | 0.185237  | -0.337907 | 0.657011  | 0.402923  | 0.614354  | 0.313044  | 0.289235  | -0.019613 | -0.365441 |
| NCU09532.2 | 0.337999  | -0.422232 | -0.437612 | -1.052726 | -1.057413 | 1.53318   | 0.648931  | 2.031695  | 0.297793  | 0.344558  |
| NCU09533.2 | -0.412222 | -0.864887 | -0.402333 | 0.387628  | 0.286818  | 2.028003  | 1.316397  | 1.960506  | 0.014989  | 0.072113  |
| NCU09534.2 | -0.890075 | -0.342107 | 0.378953  | 0.388582  | 1.307187  | 1.804828  | 0.930927  | 1.069932  | 0.326849  | 0.303283  |
| NCU09535.2 | -0.615727 | -0.102785 | 0.425083  | 1.05318   | 0.863245  | 1.442891  | 0.64217   | 0.903078  | 0.226691  | -0.112775 |
| NCU09553.2 | 0.210786  | -0.260914 | -0.478617 | 0.47511   | 0.921112  | 0.134309  |           | 0.821508  | -0.414908 | 0.163013  |
| NCU09560.2 | -0.125972 | -0.433632 | 0.09383   | 0.406136  | 0.20419   | 0.56414   | 0.189936  | 0.487385  | 0.17069   | -0.42562  |
| NCU09579.2 | -0.277757 | -0.747888 | -0.305694 | 0.279565  | -0.079755 | 0.054594  | -0.306518 | 0.133405  | 0.07658   | -0.164083 |
| NCU09646.2 | -0.173642 | 0.076929  | 0.362435  | -0.573783 |           | 0.549526  | 0.18677   | 0.465594  | 0.137521  | 0.014518  |
| NCU09692.2 | -0.733185 | 0.935339  | 0.474427  | -0.57538  | -0.77492  | 0.337299  | -0.082075 | 0.540327  | 1.363924  | -0.27851  |
| NCU09714.2 | -0.987201 | -0.259051 | -0.158329 | -0.173853 | -0.440689 | 0.099738  |           | 0.104887  | 0.198236  | -0.091609 |
| NCU09715.2 | -0.079914 | -0.035808 | 0.114182  | -0.006006 | 1.048921  | 1.069442  | 0.534271  | 0.492245  | 0.301373  | 0.074886  |
| NCU09716.2 | 0.01345   | 0.034113  | -0.405654 | 0.310024  | 0.529796  | 0.308414  | -0.285405 | 0.102286  | -0.130485 | 0.071644  |
| NCU09723.2 | 0.06353   | 0.731862  | -0.070678 | 0.484199  | 0.15897   | -0.035372 | -0.532428 | 0.157127  | -0.221854 | -5.04E-04 |
| NCU09783.2 | -0.008901 | -0.01583  | 0.195054  | -0.037459 | 0.160549  | 0.594603  | 0.636226  | 0.233734  | -0.848742 | 0.008123  |
| NCU09820.2 | -0.456449 | 0.088142  | -0.700816 | 0.596403  | 0.011877  | -0.318663 | -0.088014 | -0.191168 | -0.1617   | -0.090456 |
| NCU09821.2 | -0.690243 | 0.095502  | -0.272279 | -0.158941 | 0.824345  | 0.85374   | 0.7204    | 0.803472  | 0.757446  | -0.345215 |
| NCU09830.2 | -1.235147 | -0.813786 | 1.716003  | 3.535218  | 3.363716  | 0.878848  | 0.540825  | -0.440585 | -0.972168 | -1.675959 |
| NCU09841.2 | -0.266986 | -0.163198 | 0.627149  | 1.086311  | 1.413016  | 0.452339  | -0.275068 | 0.056316  | -0.309364 | -0.598368 |
| NCU09883.2 | -0.203788 | -0.18823  | -0.72668  | 0.09543   | 1.348962  | 0.454847  | 0.443461  | 0.679398  | -0.241173 | -0.107907 |
| NCU09931.2 | -0.184174 | -0.015878 | -0.087512 | -0.058059 | 0.467027  | 0.50394   | 0.270363  | 0.1779    | -0.372253 | -0.290383 |
| NCU09937.2 |           | -0.342864 | -0.237619 | 0.53149   | 1.286685  | -0.01128  |           |           | -0.129261 | -0.394995 |
| NCU09992.2 | -0.727367 | -0.43724  | -0.120867 | -0.062851 | -0.025692 | 0.362256  | 0.128638  | 0.107768  | -0.524963 | 0.315913  |
| NCU10011.2 | -0.358647 | -0.201253 | 0.748217  | 1.480743  | 1.063815  | 0.273019  | -0.117377 | 0.073629  | 0.118672  | -0.41877  |
| NCU10021.2 | 0.057602  | -0.113624 | -0.299849 | -0.263161 | -0.454472 | 0.964461  | 1.155913  | 1.992817  | -1.111355 | -0.06416  |
| NCU10063.2 | -1.142282 | 1.230461  | 2.710498  | 2.616664  | 1.933691  | 1.36493   | 0.728625  | 0.503855  | 0.153462  | 0.094092  |
| NCU10360.2 |           | 0.053265  | 0.270278  | -0.607067 | 0.226     | -0.264981 | 0.206149  | -0.385142 | 0.018038  | -0.877158 |

|            |           |           |           |           |           |           |           |           |           |           |
|------------|-----------|-----------|-----------|-----------|-----------|-----------|-----------|-----------|-----------|-----------|
| NCU10360.2 | -0.476109 | -0.12636  | -0.650615 | -0.016912 | -0.012503 | 0.332838  | 0.032619  | 0.389937  | -0.168069 | -0.448747 |
| NCU10656.2 | -0.452749 | -0.517684 | -0.137829 | 0.082885  | -0.38582  | 0.688185  | -0.034515 | 0.647581  | 0.189527  | -0.326668 |
| NCU10880.2 | -0.131709 | 0.243866  | -0.097785 | 1.178811  | 0.276085  | -0.046501 | -0.057794 | -0.190261 | -0.083916 | 0.009309  |
| NCU10997.2 | -2.006821 | -1.876359 | -0.892798 | -0.271819 | 1.15014   | 1.683118  | 2.040603  | 1.527207  | 1.508354  | 0.359228  |
| NCU11090.2 | -0.830844 | -1.44318  | -0.128705 | 0.740759  | 1.19572   | 2.003994  | 0.080239  | 0.758871  | 0.803738  | 0.858681  |
| xnc105_090 | -0.359208 | -0.585813 | 0.082513  | 0.807041  | 1.446877  | 0.948015  | 0.091686  | 0.420032  | 0.486168  | -0.3378   |
